# Supplementary material for: Comparative authentication of Hypericum perforatum herbal products using DNA metabarcoding, TLC and HPLC-MS
Source: PubMed Central journal article supplement (PMC5431008; doi:10.1038/s41598-017-01389-w), 2017-05-02
Supplement: 41598_2017_1389_MOESM1_ESM.pdf [file 41598_2017_1389_MOESM1_ESM.pdf]

**Comparative authentication of *Hypericum perforatum* herbal products using DNA metabarcoding, TLC and HPLC-MS**

Ancuta Cristina Raclariu, Ramona Paltinean, Laurian Vlase, Aurélie Labarre, Vincent Manzanilla, Mihael Cristin Ichim, Gianina Crisan, Anne Krag Brysting, Hugo de Boer

Supplementary Information

Supplementary Figure S1. TLC chromatograms

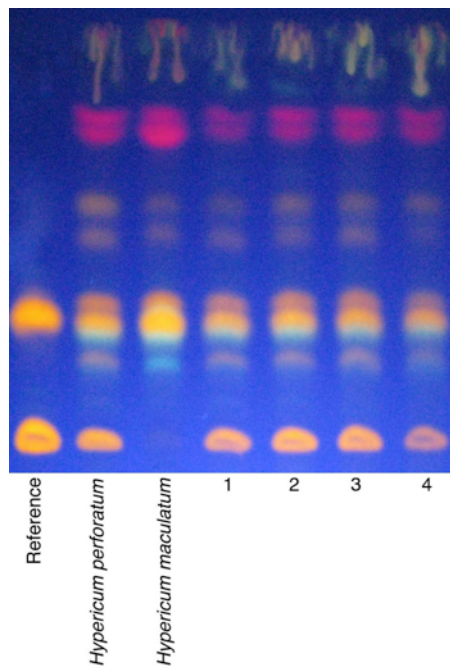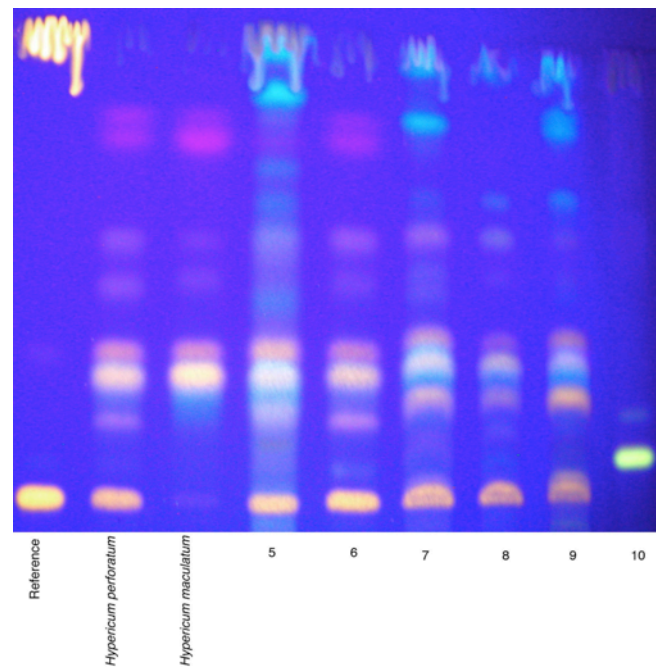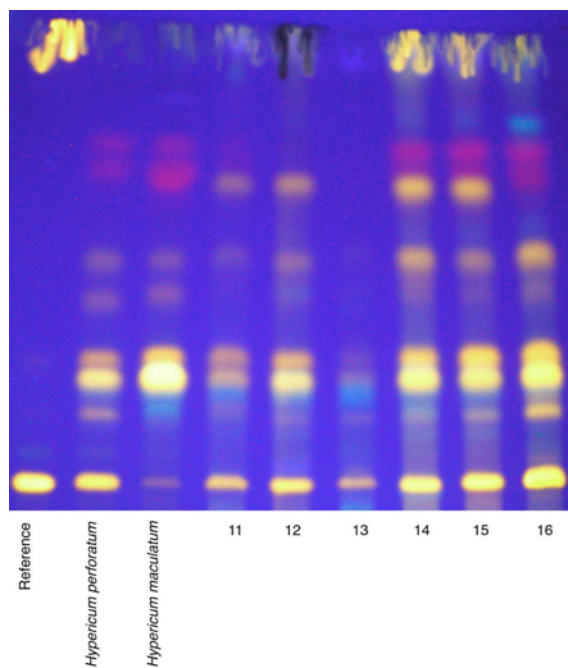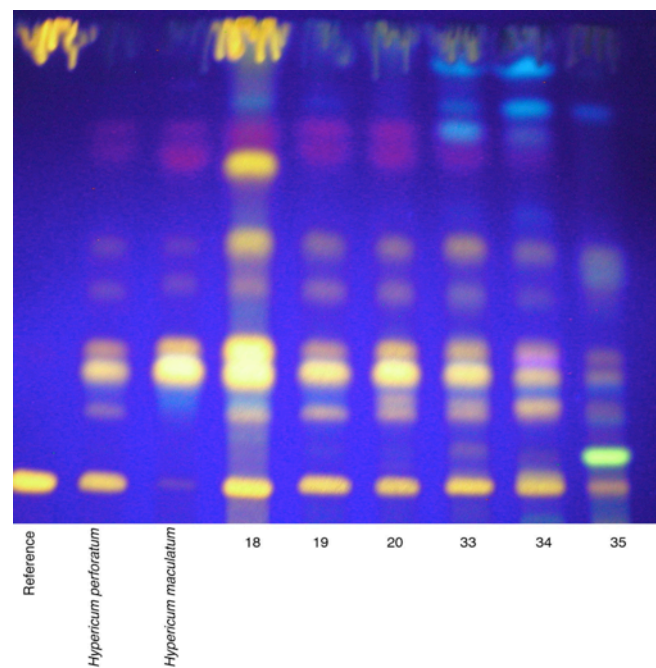

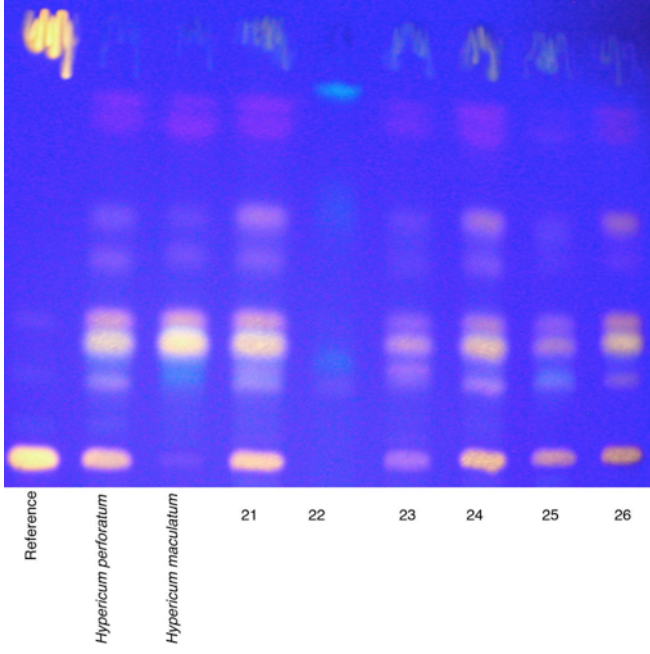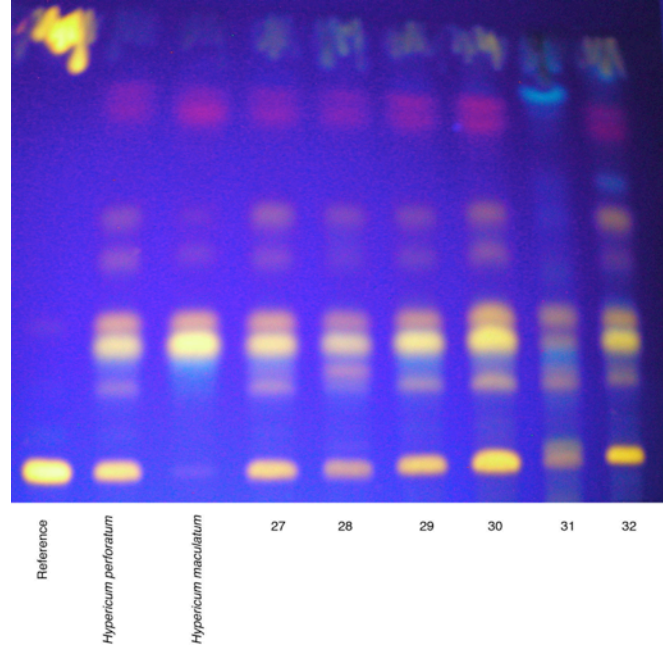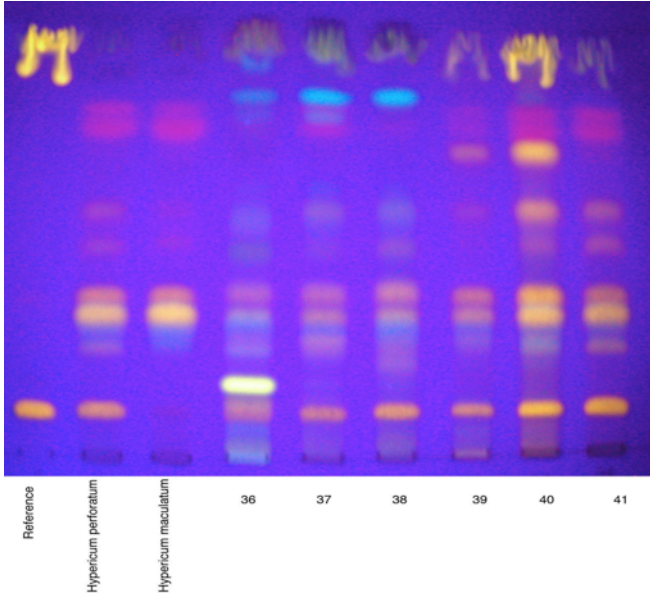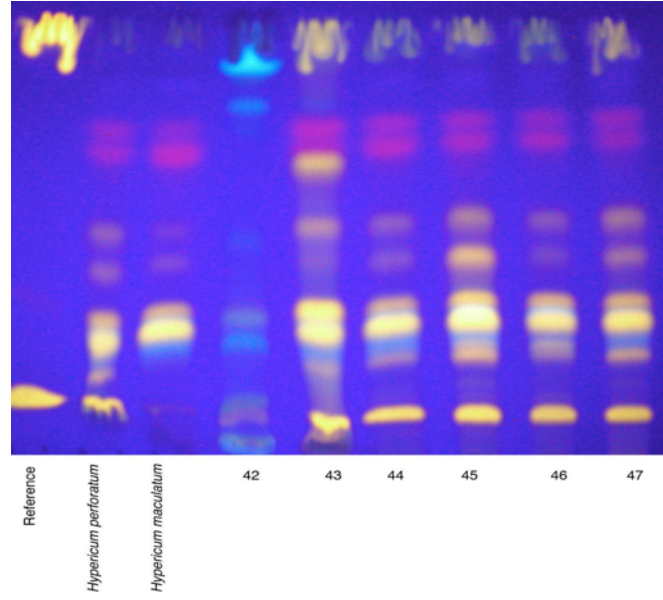

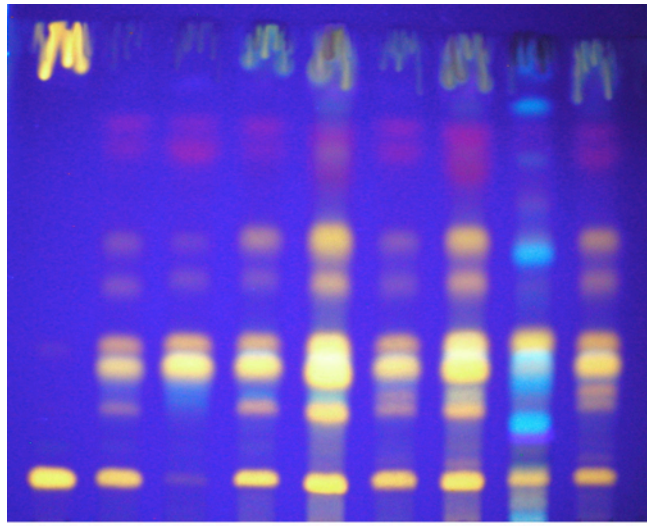

Reference  
*Hypericum perforatum*  
*Hypericum maculatum*  
 48 49 50 51 52 53

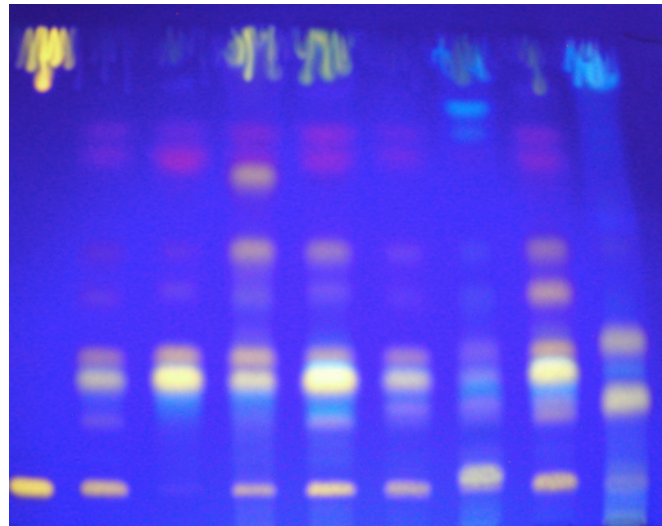

Reference  
*Hypericum perforatum*  
*Hypericum maculatum*  
 54 55 56 57 58 17

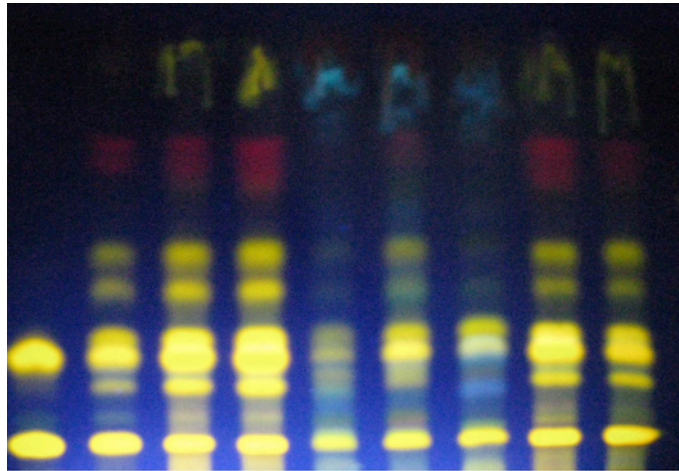

Reference  
*Hypericum perforatum*  
 60 61 62 63 64 65 66

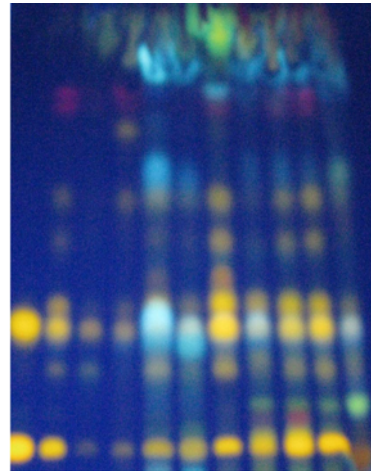

Reference  
*Hypericum perforatum*  
*Hypericum maculatum*  
 67 79 71 72 74 75 76 77

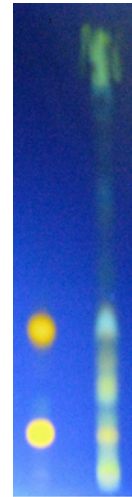

Reference  
 73



**Supplementary Table S3.** Hyperforin and hypericin concentrations measured in different species of *Hypericum* in µg/g dry weight

| Species                                 | Hyperforin (µg/g) | Hypericin (µg/g) | Source                          |
|-----------------------------------------|-------------------|------------------|---------------------------------|
| <i>H. androsaemum</i> L.                | 90                | 0                | Smelcerovic et al. 2008         |
| <i>H. aviculariifolium</i> Jaub.& Spach | 20                | 660              | Smelcerovic et al. 2008         |
| <i>H. barbatum</i> Jacq.                | 70                | 300              | Smelcerovic et al. 2006         |
| <i>H. barbatum</i> Jacq.                | 70                | 660              | Smelcerovic and Spiteller, 2006 |
| <b>Average <i>H. barbatum</i></b>       | 70                | 300-660          |                                 |
| <i>H. bithynicum</i> Boiss.             | 150               | 1050             | Smelcerovic et al. 2008         |
| <i>H. elegans</i> Stephan ex Willd.     | 82.41             | 29               | This study                      |
| <i>H. heterophyllum</i> Vent.           | 80                | 510              | Smelcerovic et al. 2008         |
| <i>H. hirsutum</i> L.                   | 60                | 40               | Smelcerovic et al. 2006         |
| <i>H. hirsutum</i> L.                   | 50                | 250              | Smelcerovic and Spiteller, 2006 |
| <i>H. hirsutum</i> L. flowers           | 0                 | 2020             | Umek et al. 1999                |
| <i>H. hirsutum</i> L. herb              | 0                 | 440              | Umek et al. 1999                |
| <i>H. hirsutum</i> L.                   | 200               | 540              | Smelcerovic et al. 2008         |
| <b>Average <i>H. hirsutum</i></b>       | 0-540             | 40-2020          |                                 |
| <i>H. humifusum</i> L. flowers          | 0                 | 1640             | Umek et al. 1999                |
| <i>H. humifusum</i> L. herb             | 0                 | 1180             | Umek et al. 1999                |
| <b>Average <i>H. humifusum</i></b>      | 0                 | 117-1640         |                                 |
| <i>H. hyssopifolium</i> Vill.           | 40                | 520              | Smelcerovic et al. 2008         |
| <i>H. linarioides</i> Bosse             | 20                | 20               | Smelcerovic et al. 2006         |
| <i>H. linarioides</i> Bosse             | 0                 | 40               | Smelcerovic and Spiteller, 2006 |
| <i>H. linarioides</i> Bosse             | 0                 | 340              | Smelcerovic et al. 2008         |
| <b>Average <i>H. linarioides</i></b>    | 0-349             | 20-40            |                                 |
| <i>H. maculatum</i> Crantz              | 50                | 30               | Smelcerovic et al. 2006         |
| <i>H. maculatum</i> Crantz (RO)         | 0                 | 142              | This study                      |
| <i>H. maculatum</i> Crantz              | 180               | 70               | Smelcerovic and Spiteller, 2006 |
| <i>H. maculatum</i> Crantz (NO)         | 35                | 46               | This study                      |
| <i>H. maculatum</i> Crantz flowers      | 0                 | 1870             | Umek et al. 1999                |
| <i>H. maculatum</i> Crantz herb         | 0                 | 460              | Umek et al. 1999                |
| <b>Average <i>H. maculatum</i></b>      | 0-180             | 30-1870          |                                 |
| <i>H. montbretii</i> Spach              | 3450              | 740              | Smelcerovic et al. 2008         |
| <i>H. montanum</i> L.                   | 0                 | 1130             | Smelcerovic et al. 2008         |
| <i>H. montanum</i> L. herb              | 0                 | 450              | Umek et al. 1999                |
| <b>Average <i>H. montanum</i></b>       | 0-1130            | 0-450            |                                 |
| <i>H. nummularioides</i> Trautv.        | 250               | 200              | Smelcerovic et al. 2008         |
| <i>H. olympicum</i> L.                  | 3955              | 11               | This study                      |
| <i>H. olympicum</i> L.                  | 20                | 50               | Smelcerovic and Spiteller, 2006 |
| <b>Average <i>H. olympicum</i></b>      | 20-3955           | 11-50            |                                 |
| <i>H. organifolium</i> Willd.           | 0                 | 0                | Smelcerovic et al. 2008         |
| <i>H. patulum</i> Thunb.                | 8532              | 153              | This study                      |
| <i>H. perforatum</i> L.                 | 140               | 290              | Smelcerovic et al. 2008         |
| <i>H. perforatum</i> L.                 | 4925              | 151              | This study                      |
| <i>H. perforatum</i> L.                 | 3550              | 170              | Smelcerovic and Spiteller, 2006 |
| <i>H. perforatum</i> L. flowers (2)     | 13590             | 5200             | Umek et al. 1999                |
| <i>H. perforatum</i> L. herb (1)        | 6010              | 1690             | Umek et al. 1999                |
| <i>H. perforatum</i> L.                 | 5460              | 3470             | Smelcerovic et al. 2008         |
| <b>Average <i>H. perforatum</i></b>     | 3470-13590        | 151-5200         |                                 |
| <i>H. orientale</i> L.                  | 30                | 20               | Smelcerovic et al. 2008         |
| <i>H. polyphyllum</i> Boiss. & Balansa  | 6030              | 18               | This study                      |
| <i>H. pruinatum</i> Boiss.& Balansa     | 50                | 360              | Smelcerovic et al. 2008         |
| <i>H. richeri</i> Vill.                 | 360               | 450              | Smelcerovic and Spiteller, 2006 |
| <i>H. rumeliacum</i> Boiss.             | 70                | 180              | Smelcerovic et al. 2006         |
| <i>H. rumeliacum</i> Boiss.             | 150               | 230              | Smelcerovic and Spiteller, 2006 |
| <b>Average <i>H. rumeliacum</i></b>     | 70-150            | 180-230          |                                 |
| <i>H. scabrum</i> L.                    | 20                | 40               | Smelcerovic et al. 2008         |
| <i>H. tetrapterum</i> Fr.               | 110               | 90               | Smelcerovic et al. 2006         |
| <i>H. tetrapterum</i> Fr.               | 270               | 150              | Smelcerovic and Spiteller, 2006 |
| <i>H. tetrapterum</i> Fr. flowers       | 0                 | 2230             | Umek et al. 1999                |
| <i>H. tetrapterum</i> Fr. herb          | 0                 | 1100             | Umek et al. 1999                |
| <b>Average <i>H. tetrapterum</i></b>    | 0-270             | 90-2230          |                                 |
| <i>H. triquetrifolium</i> Turra         | 50                | 4560             | Smelcerovic et al. 2008         |

(1) An average of 22 samples. (2) An average of 21 samples.

Supplementary Table S4. HPLC-MS results

| Sample no. | Product type | Hyperforin (µg/g of herbal product) | Hypericin (µg/g of herbal product) | Total hypericins (%) | Hyperforin absent, but hypericin present (=Hypericum sp.) | Hyperforin and hypericin present (=Hypericum sp.) | Extraction failed | Hyperforin larger than hypericin |
|------------|--------------|-------------------------------------|------------------------------------|----------------------|-----------------------------------------------------------|---------------------------------------------------|-------------------|----------------------------------|
| 1          | Herbal tea   | 444.09                              | 53.14                              | 0.005                | 0                                                         | 1                                                 | 0                 | 1                                |
| 2          | Herbal tea   | 1333                                | 81.25                              | 0.008                | 0                                                         | 1                                                 | 0                 | 1                                |
| 3          | Herbal tea   | 2491.83                             | 109.96                             | 0.011                | 0                                                         | 1                                                 | 0                 | 1                                |
| 4          | Herbal tea   | 1398.09                             | 88.1                               | 0.009                | 0                                                         | 1                                                 | 0                 | 1                                |
| 5          | Herbal tea   | 109.41                              | 6.59                               | 0.001                | 0                                                         | 1                                                 | 0                 | 1                                |
| 6          | Capsules     | 1980.92                             | 56.13                              | 0.006                | 0                                                         | 1                                                 | 0                 | 1                                |
| 7          | Capsules     | 2.79                                | 1.8                                | 0.000                | 0                                                         | 1                                                 | 0                 | 1                                |
| 8          | Capsules     | 3.65                                | 0                                  | 0.000                | 0                                                         | 0                                                 | 0                 | 1                                |
| 9          | Capsules     | 7                                   | 1.3                                | 0.000                | 0                                                         | 1                                                 | 0                 | 1                                |
| 10         | Tablets      | 16.86                               | 0                                  | 0.000                | 0                                                         | 0                                                 | 0                 | 1                                |
| 11         | Tablets      | 17                                  | 4.12                               | 0.000                | 0                                                         | 1                                                 | 0                 | 1                                |
| 12         | Tablets      | 104.18                              | 1.366                              | 0.000                | 0                                                         | 1                                                 | 0                 | 1                                |
| 13         | Capsules     | 0                                   | 0                                  | 0.000                | 2                                                         | 0                                                 | 0                 | 0                                |
| 14         | Capsules     | 4005.73                             | 287.26                             | 0.029                | 0                                                         | 1                                                 | 0                 | 1                                |
| 15         | Capsules     | 2421.38                             | 126.15                             | 0.013                | 0                                                         | 1                                                 | 0                 | 1                                |
| 16         | Tablets      | 580.35                              | 40.82                              | 0.004                | 0                                                         | 1                                                 | 0                 | 1                                |
| 17         | Herbal tea   | 4.79                                | 0                                  | 0.000                | 0                                                         | 0                                                 | 0                 | 1                                |
| 18         | Tablets      | 342.41                              | 164.82                             | 0.016                | 0                                                         | 1                                                 | 0                 | 1                                |
| 19         | Herbal tea   | 3868.03                             | 87.95                              | 0.009                | 0                                                         | 1                                                 | 0                 | 1                                |
| 20         | Herbal tea   | 270.47                              | 90.33                              | 0.009                | 0                                                         | 1                                                 | 0                 | 1                                |
| 21         | Herbal tea   | 1855.18                             | 82.59                              | 0.008                | 0                                                         | 1                                                 | 0                 | 1                                |
| 22         | Herbal tea   | 0                                   | 0                                  | 0.000                | 2                                                         | 0                                                 | 0                 | 0                                |
| 23         | Herbal tea   | 972.99                              | 43.43                              | 0.004                | 0                                                         | 1                                                 | 0                 | 1                                |
| 24         | Herbal tea   | 4650.58                             | 162.25                             | 0.016                | 0                                                         | 1                                                 | 0                 | 1                                |
| 25         | Herbal tea   | 1331.71                             | 45.41                              | 0.005                | 0                                                         | 1                                                 | 0                 | 1                                |
| 26         | Herbal tea   | 6077.32                             | 90.31                              | 0.009                | 0                                                         | 1                                                 | 0                 | 1                                |
| 27         | Herbal tea   | 6691.28                             | 63.94                              | 0.006                | 0                                                         | 1                                                 | 0                 | 1                                |
| 28         | Herbal tea   | 1034.96                             | 74.02                              | 0.007                | 0                                                         | 1                                                 | 0                 | 1                                |
| 29         | Herbal tea   | 5043.67                             | 106.77                             | 0.011                | 0                                                         | 1                                                 | 0                 | 1                                |
| 30         | Herbal tea   | 1044.15                             | 97.23                              | 0.010                | 0                                                         | 1                                                 | 0                 | 1                                |
| 31         | Herbal tea   | 198.07                              | 1.78                               | 0.000                | 0                                                         | 1                                                 | 0                 | 1                                |
| 32         | Herbal tea   | 63.48                               | 24.87                              | 0.002                | 0                                                         | 1                                                 | 0                 | 1                                |
| 33         | Herbal tea   | 46.86                               | 27.48                              | 0.003                | 0                                                         | 1                                                 | 0                 | 1                                |
| 34         | Herbal tea   | 94.68                               | 12.75                              | 0.001                | 0                                                         | 1                                                 | 0                 | 1                                |
| 35         | Herbal tea   | 83.75                               | 1.71                               | 0.000                | 0                                                         | 1                                                 | 0                 | 1                                |
| 36         | Herbal tea   | 364.5                               | 6.29                               | 0.001                | 0                                                         | 1                                                 | 0                 | 1                                |
| 37         | Herbal tea   | 165.38                              | 9.29                               | 0.001                | 0                                                         | 1                                                 | 0                 | 1                                |
| 38         | Herbal tea   | 51.49                               | 4.52                               | 0.000                | 0                                                         | 1                                                 | 0                 | 1                                |
| 39         | Tablets      | 17.57                               | 5.23                               | 0.001                | 0                                                         | 1                                                 | 0                 | 1                                |
| 40         | Tablets      | 56.81                               | 42.53                              | 0.004                | 0                                                         | 1                                                 | 0                 | 1                                |
| 41         | Capsules     | 0                                   | 61.47                              | 0.006                | 1                                                         | 0                                                 | 0                 | 0                                |
| 42         | Capsules     | 0                                   | 0                                  | 0.000                | 2                                                         | 0                                                 | 0                 | 0                                |
| 43         | Capsules     | 674.21                              | 85.15                              | 0.009                | 0                                                         | 1                                                 | 0                 | 1                                |
| 44         | Herbal tea   | 237.28                              | 106.82                             | 0.011                | 0                                                         | 1                                                 | 0                 | 1                                |
| 45         | Herbal tea   | 98.81                               | 86.4                               | 0.009                | 0                                                         | 1                                                 | 0                 | 1                                |
| 46         | Herbal tea   | 31.09                               | 109.02                             | 0.011                | 0                                                         | 1                                                 | 0                 | 0                                |
| 47         | Capsules     | 0                                   | 129.84                             | 0.013                | 1                                                         | 0                                                 | 0                 | 0                                |
| 48         | Tablets      | 0                                   | 13.25                              | 0.001                | 1                                                         | 0                                                 | 0                 | 0                                |
| 49         | Tablets      | 428.1                               | 53.07                              | 0.005                | 0                                                         | 1                                                 | 0                 | 1                                |
| 50         | Herbal tea   | 80.48                               | 118.53                             | 0.012                | 0                                                         | 1                                                 | 0                 | 0                                |
| 51         | Capsules     | 2797.5                              | 298.34                             | 0.030                | 0                                                         | 1                                                 | 0                 | 1                                |
| 52         | Herbal tea   | 318.52                              | 10.24                              | 0.001                | 0                                                         | 1                                                 | 0                 | 1                                |
| 53         | Tablets      | 116.69                              | 96.4                               | 0.010                | 0                                                         | 1                                                 | 0                 | 1                                |
| 54         | Capsules     | 758.06                              | 68.13                              | 0.007                | 0                                                         | 1                                                 | 0                 | 1                                |
| 55         | Herbal tea   | 0                                   | 80.23                              | 0.008                | 1                                                         | 0                                                 | 0                 | 0                                |
| 56         | Herbal tea   | 1108.58                             | 79.29                              | 0.008                | 0                                                         | 1                                                 | 0                 | 1                                |
| 57         | Herbal tea   | 80.61                               | 12.3                               | 0.001                | 0                                                         | 1                                                 | 0                 | 1                                |
| 58         | Herbal tea   | 4925.43                             | 151.97                             | 0.015                | 0                                                         | 1                                                 | 0                 | 1                                |
| 59         | Extract      |                                     |                                    | 0.000                | 0                                                         | 0                                                 | 1                 | 0                                |
| 60         | Tablets      | 31.03                               | 42.61                              | 0.004                | 0                                                         | 1                                                 | 0                 | 0                                |
| 61         | Tablets      | 89.71                               | 85.74                              | 0.009                | 0                                                         | 1                                                 | 0                 | 1                                |
| 62         | Herbal tea   | 72                                  | 3.58                               | 0.000                | 0                                                         | 1                                                 | 0                 | 1                                |
| 63         | Herbal tea   | 219.68                              | 15.02                              | 0.002                | 0                                                         | 1                                                 | 0                 | 1                                |
| 64         | Herbal tea   | 84.6                                | 1.99                               | 0.000                | 0                                                         | 1                                                 | 0                 | 1                                |
| 65         | Tablets      | 683.63                              | 109.75                             | 0.011                | 0                                                         | 1                                                 | 0                 | 1                                |
| 66         | Capsules     | 2713.27                             | 92.4                               | 0.009                | 0                                                         | 1                                                 | 0                 | 1                                |
| 67         | Tablets      | 52                                  | 24.78                              | 0.002                | 0                                                         | 1                                                 | 0                 | 1                                |
| 68         | Extract      |                                     |                                    | 0.000                | 0                                                         | 0                                                 | 1                 | 0                                |
| 69         | Extract      |                                     |                                    | 0.000                | 0                                                         | 0                                                 | 1                 | 0                                |
| 70         | Herbal tea   | 0                                   | 1.83                               | 0.000                | 1                                                         | 0                                                 | 0                 | 0                                |
| 71         | Herbal tea   | 51.21                               | 1.39                               | 0.000                | 0                                                         | 1                                                 | 0                 | 1                                |
| 72         | Capsules     | 19.03                               | 6.33                               | 0.001                | 0                                                         | 1                                                 | 0                 | 1                                |
| 73         | Extract      | 0                                   | 0                                  | 0.000                | 2                                                         | 0                                                 | 0                 | 0                                |
| 74         | Herbal tea   | 44.48                               | 2.39                               | 0.000                | 0                                                         | 1                                                 | 0                 | 1                                |
| 75         | Herbal tea   | 147.92                              | 8.8                                | 0.001                | 0                                                         | 1                                                 | 0                 | 1                                |
| 76         | Herbal tea   | 689.36                              | 14.66                              | 0.001                | 0                                                         | 1                                                 | 0                 | 1                                |
| 77         | Herbal tea   | 223                                 | 2.43                               | 0.000                | 0                                                         | 1                                                 | 0                 | 1                                |
| 78         | Extract      |                                     |                                    | 0.000                | 0                                                         | 0                                                 | 1                 | 0                                |

Supplementary Table S5. HTS success

| Product | Reads     |                                    | nrITS1                             |                                |              | nrITS2              |                                |              |
|---------|-----------|------------------------------------|------------------------------------|--------------------------------|--------------|---------------------|--------------------------------|--------------|
|         | No.       | No. of bases before demultiplexing | No. of reads before demultiplexing | Amplicon concentration (ng/ul) | No. of reads | No. of bases (>Q20) | Amplicon concentration (ng/ul) | No. of reads |
| 1       | 62722750  | 285184                             | 3.70                               | 258020                         | 19830698     | 4.69                | 16022                          | 1578942      |
| 2       | 47358     | 307                                | 4.10                               | 6                              | 514          | 0.95                | 238                            | 12464        |
| 3       | 521886    | 2161                               | 2.91                               | 652                            | 58148        | 2.88                | 1361                           | 118469       |
| 4       | 47455333  | 208055                             | 3.30                               | 115965                         | 9196791      | 1.68                | 79050                          | 7101592      |
| 5       | 22231491  | 145827                             | 2.96                               | 44775                          | 3356973      | 1.46                | 80022                          | 3183064      |
| 6       | 12558328  | 63808                              | 4.02                               | 21329                          | 1564485      | 1.42                | 35834                          | 2711535      |
| 7       | 17804     | 64                                 | 1.72                               | 24                             | 2925         | 1.12                | 32                             | 2779         |
| 8       | 1386042   | 5492                               | 0.39                               | 3331                           | 381846       | 0.25                | 1724                           | 103955       |
| 9       | 8988      | 55                                 | 1.55                               | 27                             | 1662         | 0.89                | 26                             | 1065         |
| 10      | 75383619  | 278105                             | 6.06                               | 178262                         | 20295668     | 4.33                | 83862                          | 0            |
| 11      | 2370      | 8                                  | 0.89                               | 8                              | 891          | 0.88                | 0                              | 0            |
| 12      | 35056989  | 151616                             | 0.15                               | 0                              | 0            | 0.13                | 0                              | 0            |
| 13      | 4389      | 14                                 | 0.17                               | 10                             | 1424         | 0.13                | 0                              | 0            |
| 14      | 0         | 0                                  | 0.12                               | 0                              | 0            | 0.16                | 0                              | 0            |
| 15      | 27614658  | 86515                              | 1.18                               | 68820                          | 8868686      | 0.91                | 15439                          | 1711591      |
| 16      | 0         | 0                                  | 0.25                               | 0                              | 0            | 0.13                | 0                              | 0            |
| 17      | 1544147   | 5029                               | 0.06                               | 3140                           | 336506       | 0.21                | 734                            | 86450        |
| 18      | 1903      | 10                                 | 0.12                               | 9                              | 599          | 0.30                | 0                              | 0            |
| 19      | 10037     | 34                                 | 1.43                               | 29                             | 2997         | 2.59                | 4                              | 513          |
| 20      | 5212      | 23                                 | 2.66                               | 18                             | 1582         | 4.27                | 3                              | 9            |
| 21      | 138559130 | 566977                             | 2.14                               | 205015                         | 19729261     | 3.50                | 320385                         | 30508847     |
| 22      | 2028      | 8                                  | 6.84                               | 0                              | 0            | 1.86                | 3                              | 293          |
| 23      | 1402      | 4                                  | 8.51                               | 2                              | 272          | 4.08                | 2                              | 291          |
| 24      | 83221168  | 319287                             | 4.71                               | 121339                         | 11588669     | 1.16                | 181237                         | 18954323     |
| 25      | 6077      | 21                                 | 1.39                               | 16                             | 1683         | 1.99                | 2                              | 266          |
| 26      | 9830      | 35                                 | 4.25                               | 27                             | 2806         | 1.28                | 2                              | 37           |
| 27      | 71059267  | 278718                             | 4.53                               | 138667                         | 13045974     | 1.74                | 125391                         | 12717263     |
| 28      | 6294      | 32                                 | 2.14                               | 19                             | 1868         | 0.69                | 7                              | 77           |
| 29      | 56684931  | 226221                             | 3.22                               | 183332                         | 17339018     | 3.68                | 29203                          | 2452257      |
| 30      | 53107442  | 242925                             | 2.00                               | 192134                         | 14919716     | 3.10                | 34767                          | 3221126      |
| 31      | 1350      | 7                                  | 2.43                               | 0                              | 0            | 2.30                | 0                              | 0            |
| 32      | 29831458  | 114441                             | 4.57                               | 64443                          | 6636146      | 5.37                | 42496                          | 4057305      |
| 33      | 3667      | 13                                 | 4.08                               | 2                              | 116          | 5.72                | 1                              | 4            |
| 34      | 22082     | 95                                 | 1.70                               | 71                             | 7040         | 3.34                | 12                             | 334          |
| 35      | 22344764  | 73322                              | 5.61                               | 44708                          | 5422673      | 6.83                | 26203                          | 3230857      |
| 36      | 6503      | 21                                 | 4.99                               | 10                             | 1283         | 2.92                | 8                              | 838          |
| 37      | 98800823  | 441576                             | 5.05                               | 208647                         | 19367123     | 2.14                | 192205                         | 15149014     |
| 38      | 62730698  | 259246                             | 4.09                               | 165272                         | 14664712     | 3.37                | 77438                          | 7002425      |
| 39      | 43379160  | 45620                              | 1.67                               | 97249                          | 11054541     | 1.26                | 43372                          | 5214116      |
| 40      | 459       | 2                                  | 1.61                               | 0                              | 0            | 1.17                | 0                              | 0            |
| 41      | 15171     | 69                                 | 2.62                               | 0                              | 0            | 1.12                | 2                              | 303          |
| 42      | 80345560  | 299829                             | 3.91                               | 198256                         | 21106677     | 4.52                | 80502                          | 7903473      |
| 43      | 46950181  | 168677                             | 4.36                               | 92104                          | 10485352     | 1.87                | 67209                          | 6991979      |
| 44      | 164237026 | 672962                             | 3.76                               | 591566                         | 54135759     | 4.11                | 48363                          | 2761743      |
| 45      | 1282      | 4                                  | 9.87                               | 2                              | 244          | 0.23                | 2                              | 237          |
| 46      | 102410827 | 376539                             | 2.62                               | 283073                         | 29390005     | 2.54                | 78775                          | 7969442      |
| 47      | 125       | 2                                  | 0.08                               | 1                              | 17           | 0.04                | 0                              | 0            |
| 48      | 44196732  | 150787                             | 0.18                               | 141146                         | 15649176     | 0.07                | 4419                           | 299653       |
| 49      | 27291     | 100                                | 0.64                               | 69                             | 7625         | 0.19                | 0                              | 0            |
| 50      | 76087488  | 287856                             | 7.65                               | 105680                         | 8446677      | 0.74                | 171362                         | 19150153     |
| 51      | 25615264  | 87625                              | 0.18                               | 12048                          | 1326009      | 0.14                | 18                             | 8462273      |
| 52      | 4911      | 33                                 | 8.22                               | 8                              | 355          | 0.41                | 13                             | 990          |
| 53      | 337       | 2                                  | 0.06                               | 2                              | 101          | 0.11                | 0                              | 0            |
| 54      | 2913      | 13                                 | 4.43                               | 0                              | 0            | 2.05                | 13                             | 941          |
| 55      | 27503996  | 94631                              | 0.30                               | 91606                          | 9700289      | 0.18                | 103                            | 2256         |
| 56      | 2545      | 10                                 | 2.59                               | 4                              | 339          | 1.41                | 4                              | 586          |
| 57      | 21533     | 154                                | 2.89                               | 0                              | 0            | 1.33                | 104                            | 4579         |
| 58      | 8840      | 36                                 | 4.28                               | 24                             | 2557         | 0.36                | 6                              | 439          |
| 59      | 5273773   | 22446                              | 0.20                               | 6584                           | 566608       | 0.17                | 15042                          | 1226366      |
| 60      | 1235      | 6                                  | 0.19                               | 1                              | 1            | 0.39                | 3                              | 254          |
| 61      | 29752850  | 118302                             | 0.22                               | 74241                          | 7862582      | 0.50                | 39185                          | 2473510      |
| 62      | 8383      | 28                                 | 9.32                               | 6                              | 722          | 0.39                | 21                             | 2455         |
| 63      | 5413      | 17                                 | 1.63                               | 8                              | 1154         | 0.35                | 1                              | 1            |
| 64      | 7966      | 32                                 | 7.60                               | 0                              | 0            | 0.33                | 31                             | 3036         |
| 65      | 17529659  | 52196                              | 0.25                               | 50670                          | 6663535      | 0.49                | 261                            | 28162        |
| 66      | 0         | 0                                  | 0.12                               | 0                              | 0            | 0.19                | 0                              | 0            |
| 67      | 0         | 0                                  | 0.12                               | 0                              | 0            | 0.05                | 0                              | 0            |
| 68      | 0         | 0                                  | 0.20                               | 0                              | 0            | 0.15                | 0                              | 0            |
| 69      | 0         | 0                                  | 0.17                               | 0                              | 0            | 0.21                | 0                              | 0            |
| 70      | 10179     | 41                                 | 1.97                               | 29                             | 2816         | 1.99                | 0                              | 0            |
| 71      | 55062199  | 220984                             | 1.45                               | 70947                          | 7534569      | 4.36                | 131918                         | 12071501     |
| 72      | 114616133 | 435823                             | 1.97                               | 180484                         | 21776940     | 0.29                | 220087                         | 20829439     |
| 73      | 26683841  | 106119                             | 2.30                               | 17391                          | 1481069      | 0.57                | 83635                          | 8025957      |
| 74      | 265805068 | 1044831                            | 1.58                               | 303233                         | 28037295     | 2.21                | 654831                         | 70358140     |
| 75      | 66354277  | 298951                             | 2.47                               | 139169                         | 12433535     | 1.75                | 131723                         | 10373161     |
| 76      | 86083702  | 377066                             | 1.82                               | 217576                         | 19943312     | 0.84                | 119966                         | 10397432     |
| 77      | 150477835 | 596181                             | 1.61                               | 292909                         | 29389441     | 1.40                | 253969                         | 24631492     |
| 78      | 60778605  | 202803                             | 0.92                               | 120092                         | 14223598     | 0.95                | 72348                          | 8575923      |



# A Supplementary Information Figure S6

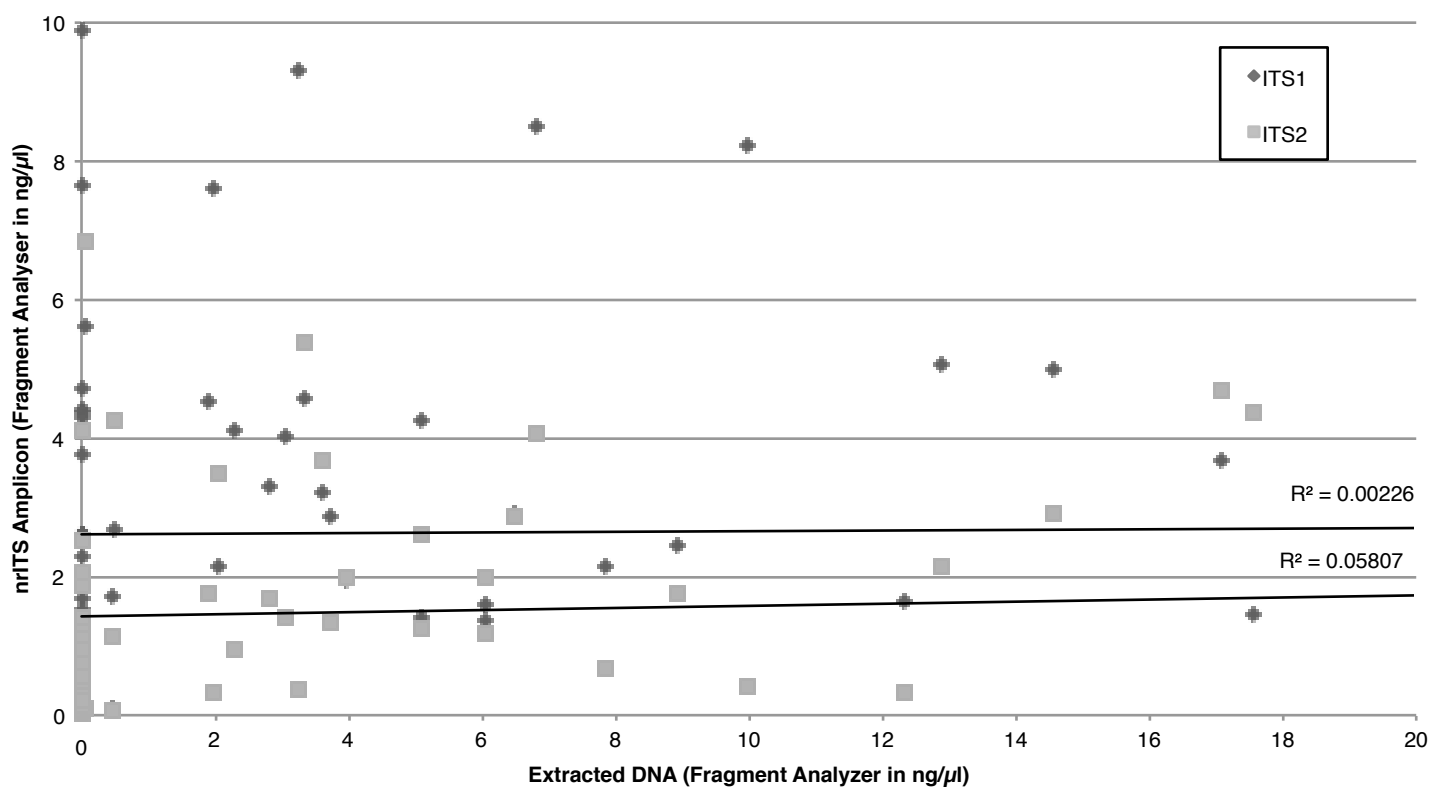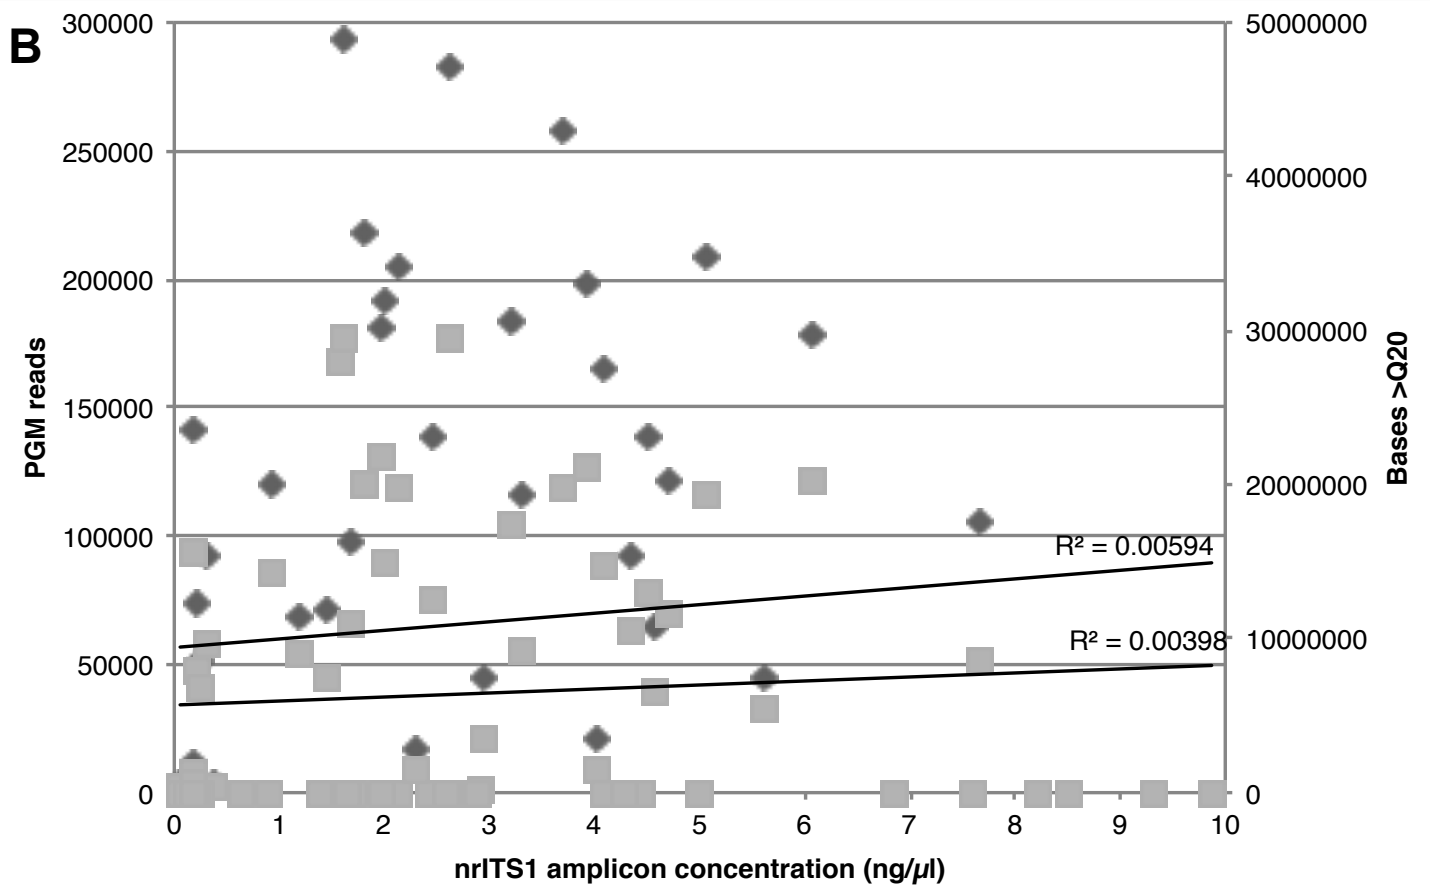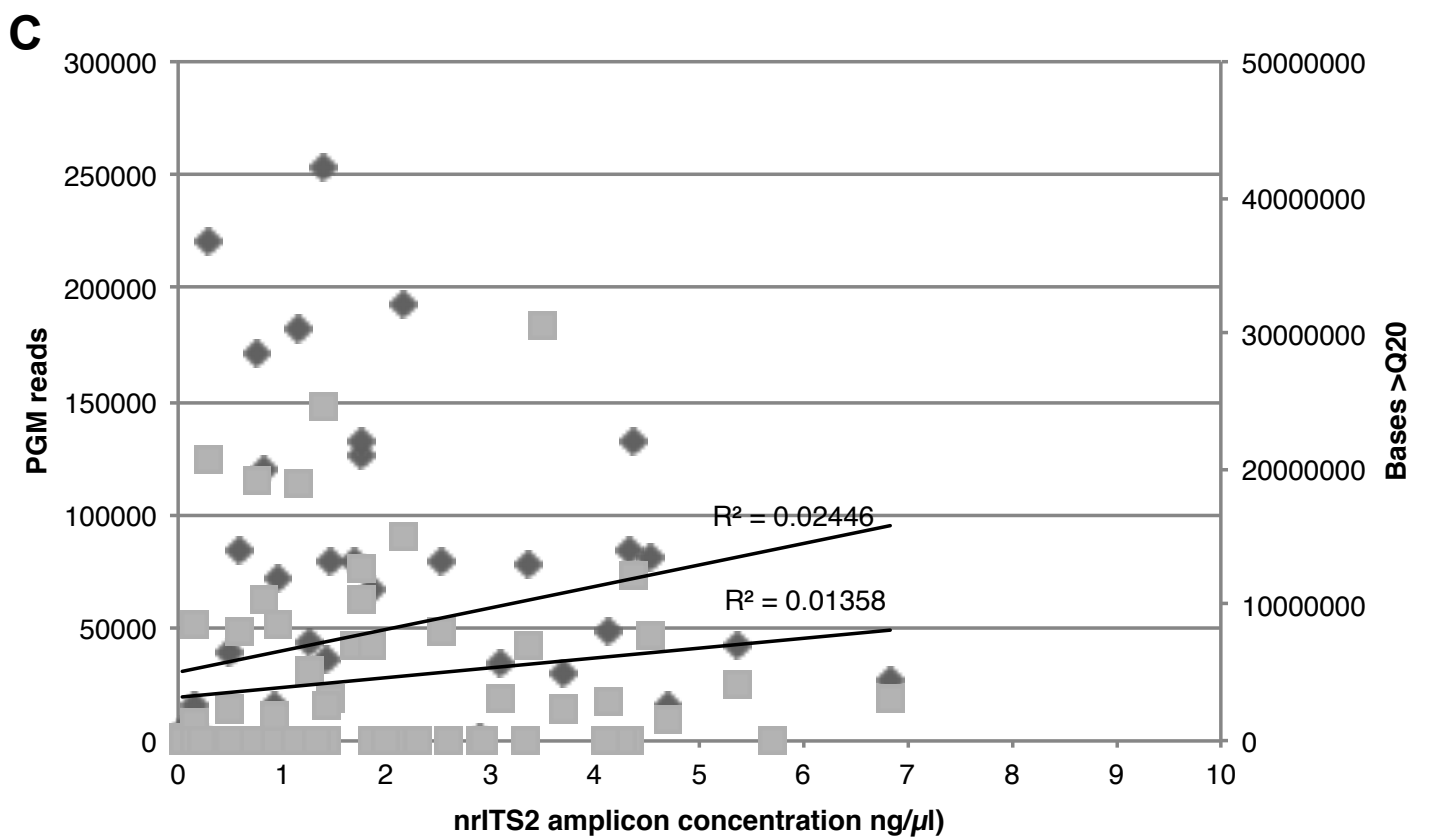

Supplementary Figure S8. nrITS1 heatmap of relative abundances of normalized read numbers

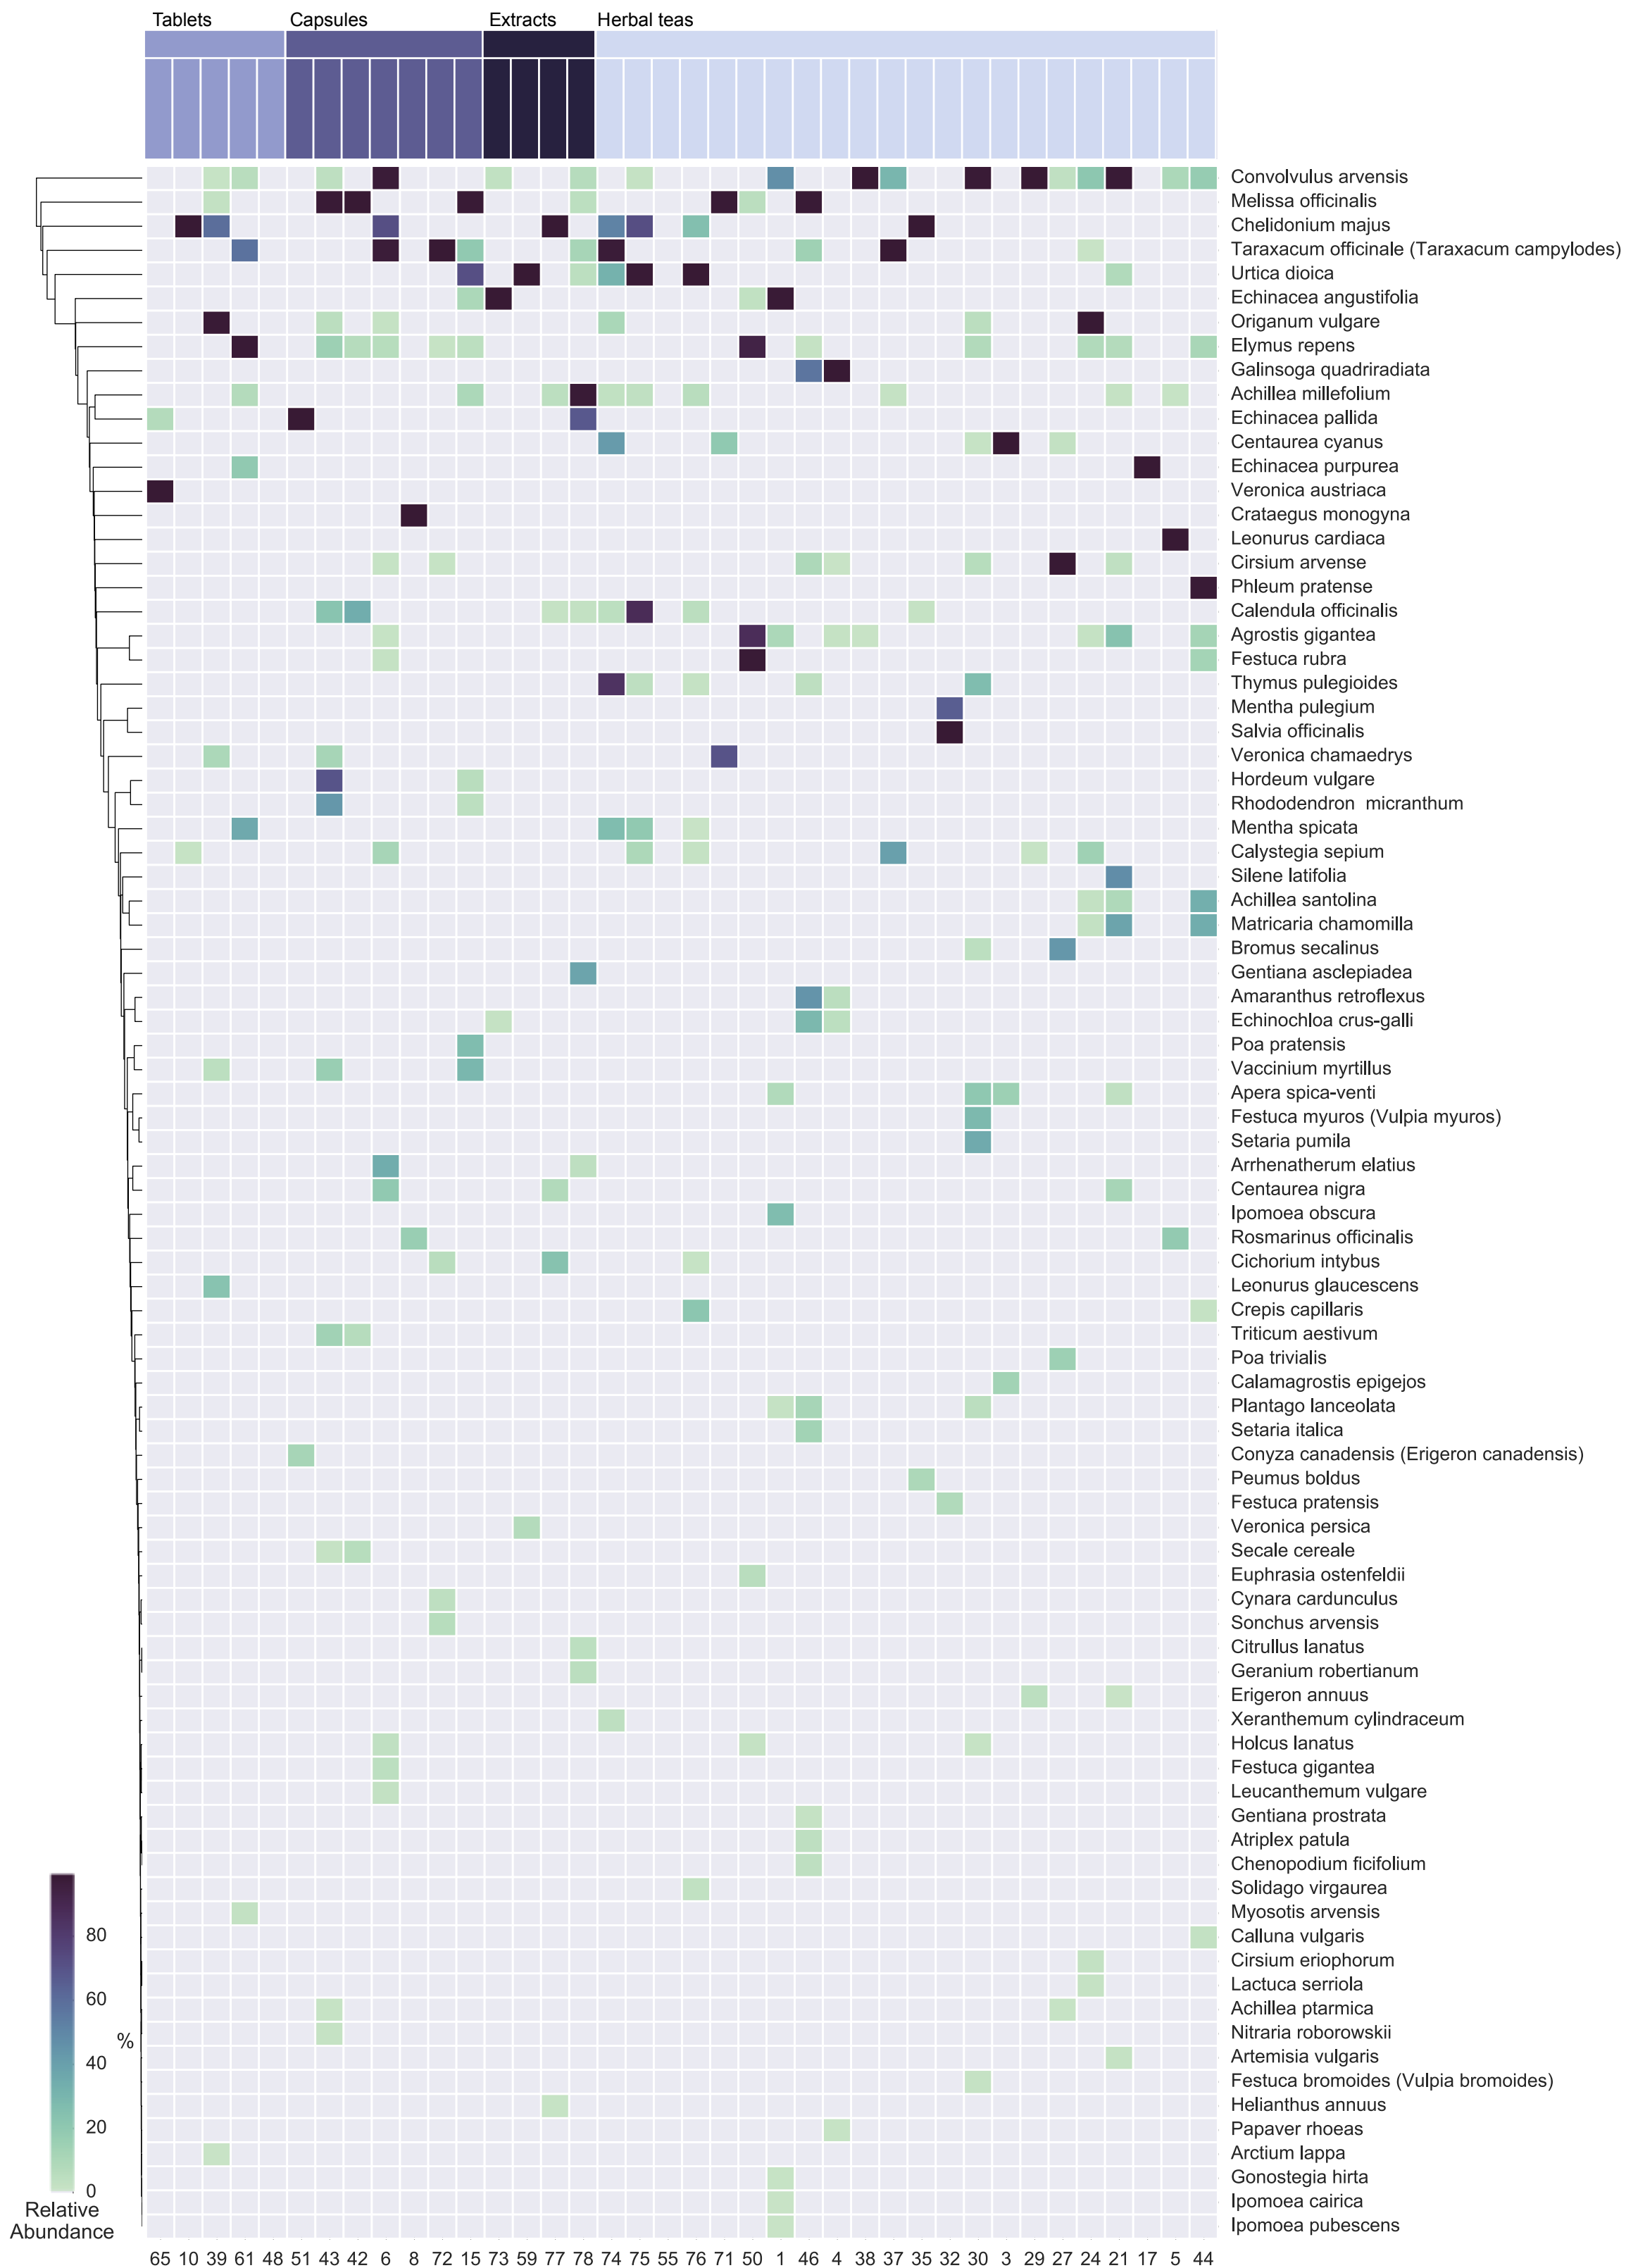

Supplementary Figure S9. nrITS2 heatmap of relative abundance of normalized read numbers

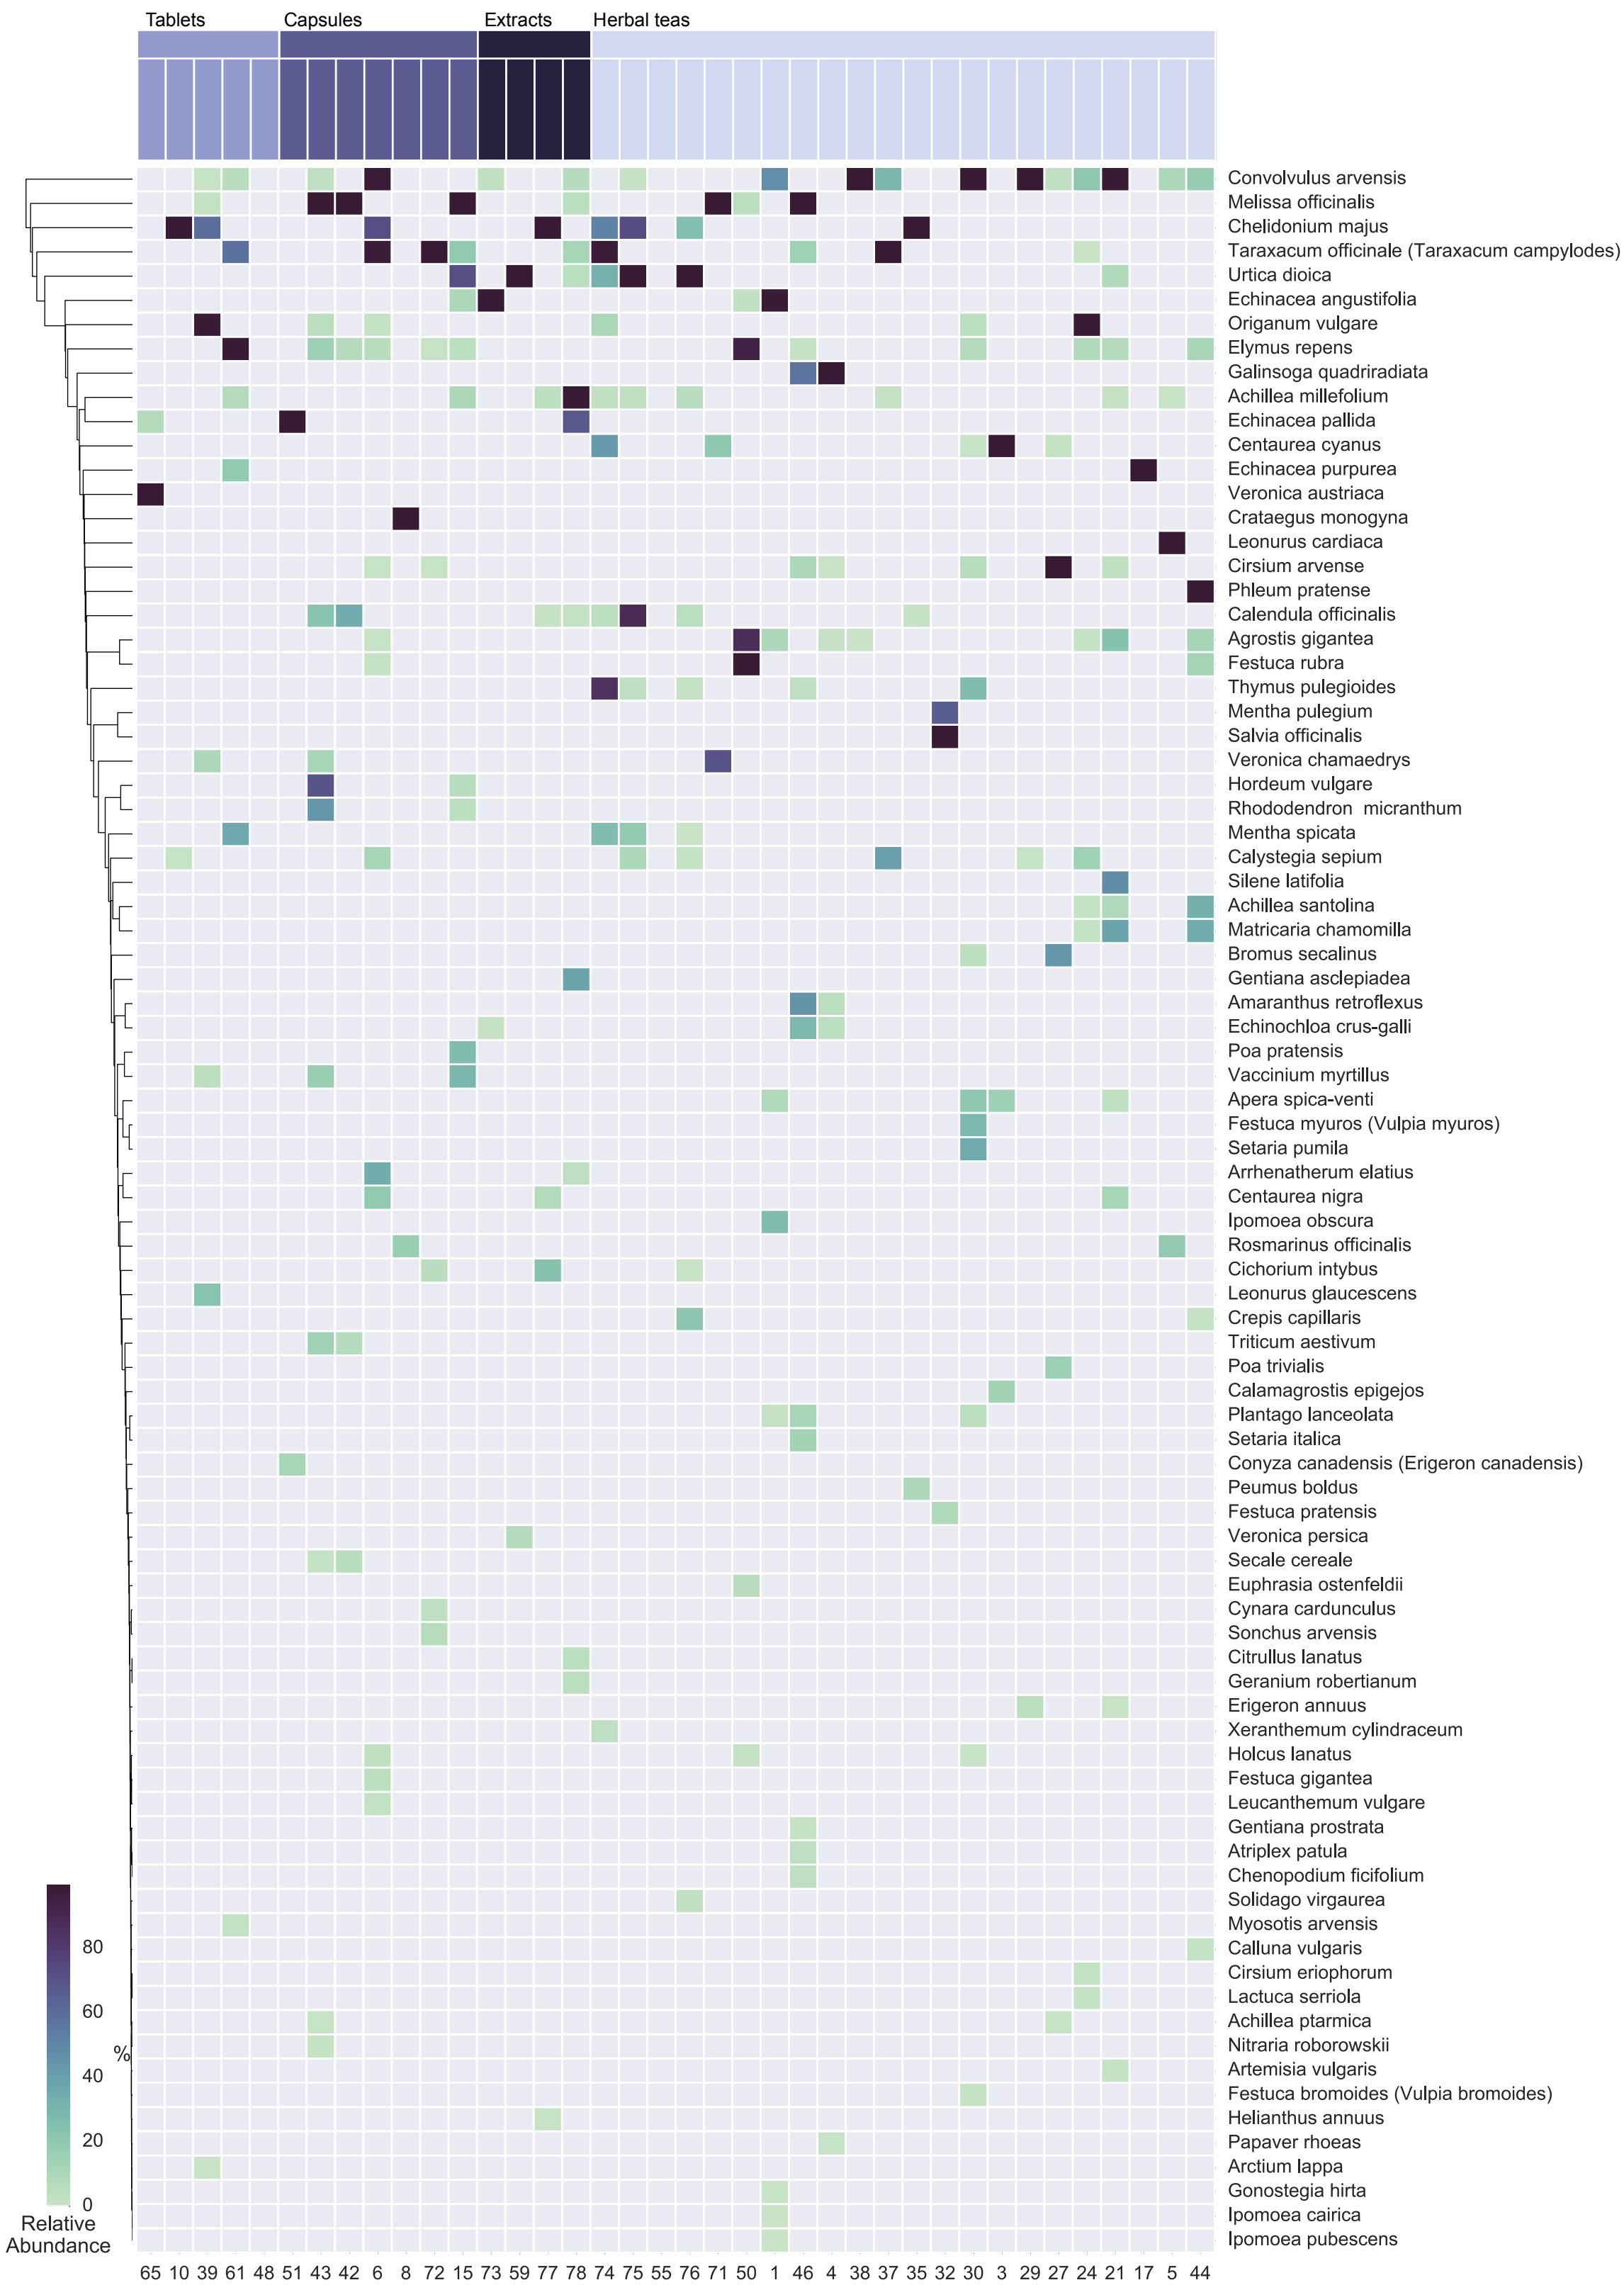

Supplementary Table S10. Information about products

| Sample no. | Number of species on label | Scientific names of the plant ingredients                                                          | Product type | Country of origin | Country of acquisition | Vendor type | Product classification |
|------------|----------------------------|----------------------------------------------------------------------------------------------------|--------------|-------------------|------------------------|-------------|------------------------|
| 1          | 1                          | <i>Hypericum perforatum</i> L.                                                                     | Herbal teas  | Romania           | Romania                | Pharmacy    | Unknown                |
| 2          | 1                          | <i>Hypericum perforatum</i> L.                                                                     | Herbal teas  | Romania           | Romania                | Pharmacy    | Food supplement        |
| 3          | 1                          | <i>Hypericum perforatum</i> L.                                                                     | Herbal teas  | Romania           | Romania                | Pharmacy    | Food supplement        |
| 4          | 1                          | <i>Hypericum perforatum</i> L.                                                                     | Herbal teas  | Romania           | Romania                | Pharmacy    | Food supplement        |
| 5          | 10                         | <i>Achillea millefolium</i> L.                                                                     | Herbal teas  | Romania           | Romania                | Pharmacy    | Food supplement        |
| 5          | 10                         | <i>Crataegus monogyna</i> Jacq.                                                                    | Herbal teas  | Romania           | Romania                | Pharmacy    | Food supplement        |
| 5          | 10                         | <i>Equisetum arvense</i> L.                                                                        | Herbal teas  | Romania           | Romania                | Pharmacy    | Food supplement        |
| 5          | 10                         | <i>Glycyrrhiza glabra</i> L.                                                                       | Herbal teas  | Romania           | Romania                | Pharmacy    | Food supplement        |
| 5          | 10                         | <i>Hypericum perforatum</i> L.                                                                     | Herbal teas  | Romania           | Romania                | Pharmacy    | Food supplement        |
| 5          | 10                         | <i>Lavandula angustifolia</i> subsp. <i>angustifolia</i> (syn. <i>Lavandula officinalis</i> Chaix) | Herbal teas  | Romania           | Romania                | Pharmacy    | Food supplement        |
| 5          | 10                         | <i>Leonurus cardiaca</i> L.                                                                        | Herbal teas  | Romania           | Romania                | Pharmacy    | Food supplement        |
| 5          | 10                         | <i>Rosmarinus officinalis</i> L.                                                                   | Herbal teas  | Romania           | Romania                | Pharmacy    | Food supplement        |
| 5          | 10                         | <i>Sambucus nigra</i> L.                                                                           | Herbal teas  | Romania           | Romania                | Pharmacy    | Food supplement        |
| 5          | 10                         | <i>Valeriana officinalis</i> L.                                                                    | Herbal teas  | Romania           | Romania                | Pharmacy    | Food supplement        |
| 6          | 2                          | <i>Hypericum perforatum</i> L.                                                                     | Capsules     | Romania           | Romania                | E-commerce  | Food supplement        |
| 6          | 2                          | <i>Panax ginseng</i>                                                                               | Capsules     | Romania           | Romania                | E-commerce  | Food supplement        |
| 7          | 7                          | <i>Arctium lappa</i> L.                                                                            | Capsules     | Romania           | Romania                | Pharmacy    | Food supplement        |
| 7          | 7                          | <i>Elaeagnus rhamnoides</i> (L.) A.Nelson ( <i>Hippophae rhamnoides</i> L.)                        | Capsules     | Romania           | Romania                | Pharmacy    | Food supplement        |
| 7          | 7                          | <i>Hypericum perforatum</i> L.                                                                     | Capsules     | Romania           | Romania                | Pharmacy    | Food supplement        |
| 7          | 7                          | <i>Lycopodium clavatum</i> L.                                                                      | Capsules     | Romania           | Romania                | Pharmacy    | Food supplement        |
| 7          | 7                          | <i>Salix alba</i> L.                                                                               | Capsules     | Romania           | Romania                | Pharmacy    | Food supplement        |
| 7          | 7                          | <i>Taraxacum officinale</i> Webb                                                                   | Capsules     | Romania           | Romania                | Pharmacy    | Food supplement        |
| 7          | 7                          | <i>Thymus serpyllum</i> L.                                                                         | Capsules     | Romania           | Romania                | Pharmacy    | Food supplement        |
| 8          | 7                          | <i>Acorus calamus</i> var. <i>americanus</i> Raf.                                                  | Capsules     | Romania           | Romania                | Pharmacy    | Food supplement        |
| 8          | 7                          | <i>Allium ursinum</i> L.                                                                           | Capsules     | Romania           | Romania                | Pharmacy    | Food supplement        |
| 8          | 7                          | <i>Elaeagnus rhamnoides</i> (L.) A.Nelson ( <i>Hippophae rhamnoides</i> L.)                        | Capsules     | Romania           | Romania                | Pharmacy    | Food supplement        |
| 8          | 7                          | <i>Hypericum perforatum</i> L.                                                                     | Capsules     | Romania           | Romania                | Pharmacy    | Food supplement        |
| 8          | 7                          | <i>Lycopodium clavatum</i> L.                                                                      | Capsules     | Romania           | Romania                | Pharmacy    | Food supplement        |
| 8          | 7                          | <i>Mentha pulegium</i> L.                                                                          | Capsules     | Romania           | Romania                | Pharmacy    | Food supplement        |
| 8          | 7                          | <i>Salvia officinalis</i> L.                                                                       | Capsules     | Romania           | Romania                | Pharmacy    | Food supplement        |
| 9          | 9                          | <i>Achillea millefolium</i> L.                                                                     | Capsules     | Romania           | Romania                | Pharmacy    | Food supplement        |
| 9          | 9                          | <i>Acorus calamus</i> var. <i>americanus</i> Raf.                                                  | Capsules     | Romania           | Romania                | Pharmacy    | Food supplement        |
| 9          | 9                          | <i>Calendula officinalis</i> L.                                                                    | Capsules     | Romania           | Romania                | Pharmacy    | Food supplement        |
| 9          | 9                          | <i>Foeniculum vulgare</i> Mill.                                                                    | Capsules     | Romania           | Romania                | Pharmacy    | Food supplement        |
| 9          | 9                          | <i>Hypericum perforatum</i> L.                                                                     | Capsules     | Romania           | Romania                | Pharmacy    | Food supplement        |
| 9          | 9                          | <i>Mentha x piperita</i> L.                                                                        | Capsules     | Romania           | Romania                | Pharmacy    | Food supplement        |
| 9          | 9                          | <i>Robinia pseudoacacia</i> L.                                                                     | Capsules     | Romania           | Romania                | Pharmacy    | Food supplement        |
| 9          | 9                          | <i>Rubus idaeus</i> L.                                                                             | Capsules     | Romania           | Romania                | Pharmacy    | Food supplement        |
| 9          | 9                          | <i>Taraxacum officinale</i> Webb                                                                   | Capsules     | Romania           | Romania                | Pharmacy    | Food supplement        |
| 10         | 6                          | <i>Chelidonium majus</i> L.                                                                        | Tablets      | Romania           | Romania                | Pharmacy    | Food supplement        |
| 10         | 6                          | <i>Cynara scolymus</i> L.                                                                          | Tablets      | Romania           | Romania                | Pharmacy    | Food supplement        |
| 10         | 6                          | <i>Epilobium hirsutum</i> L.                                                                       | Tablets      | Romania           | Romania                | Pharmacy    | Food supplement        |
| 10         | 6                          | <i>Humulus lupulus</i> L.                                                                          | Tablets      | Romania           | Romania                | Pharmacy    | Food supplement        |
| 10         | 6                          | <i>Humulus lupulus</i> L.                                                                          | Tablets      | Romania           | Romania                | Pharmacy    | Food supplement        |
| 10         | 6                          | <i>Hypericum perforatum</i> L.                                                                     | Tablets      | Romania           | Romania                | Pharmacy    | Food supplement        |
| 10         | 6                          | <i>Valeriana officinalis</i> L.                                                                    | Tablets      | Romania           | Romania                | Pharmacy    | Food supplement        |
| 11         | 5                          | <i>Calendula officinalis</i> L.                                                                    | Tablets      | Romania           | Romania                | Pharmacy    | Food supplement        |
| 11         | 5                          | <i>Foeniculum vulgare</i> Mill.                                                                    | Tablets      | Romania           | Romania                | Pharmacy    | Food supplement        |
| 11         | 5                          | <i>Hypericum perforatum</i> L.                                                                     | Tablets      | Romania           | Romania                | Pharmacy    | Food supplement        |
| 11         | 5                          | <i>Origanum vulgare</i> L.                                                                         | Tablets      | Romania           | Romania                | Pharmacy    | Food supplement        |
| 11         | 5                          | <i>Plantago</i> spp.                                                                               | Tablets      | Romania           | Romania                | Pharmacy    | Food supplement        |
| 12         | 2                          | <i>Hypericum perforatum</i> L.                                                                     | Tablets      | Romania           | Romania                | Pharmacy    | Food supplement        |
| 12         | 2                          | <i>Spirulina platensis</i> (Gomont) Geitler                                                        | Tablets      | Romania           | Romania                | Pharmacy    | Food supplement        |
| 13         | 5                          | <i>Humulus lupulus</i> L.                                                                          | Capsules     | Romania           | Romania                | Pharmacy    | Food supplement        |
| 13         | 5                          | <i>Hypericum perforatum</i> L.                                                                     | Capsules     | Romania           | Romania                | Pharmacy    | Food supplement        |
| 13         | 5                          | <i>Leonurus cardiaca</i> L.                                                                        | Capsules     | Romania           | Romania                | Pharmacy    | Food supplement        |
| 13         | 5                          | <i>Tilia cordata</i> Mill.                                                                         | Capsules     | Romania           | Romania                | Pharmacy    | Food supplement        |
| 13         | 5                          | <i>Valeriana officinalis</i> L.                                                                    | Capsules     | Romania           | Romania                | Pharmacy    | Food supplement        |
| 14         | 2                          | <i>Griffonia simplicifolia</i> (DC.) Baill.                                                        | Capsules     | China             | Romania                | Pharmacy    | Food supplement        |
| 14         | 2                          | <i>Hypericum perforatum</i> L.                                                                     | Capsules     | China             | Romania                | Pharmacy    | Food supplement        |
| 15         | 1                          | <i>Hypericum perforatum</i> L.                                                                     | Capsules     | Romania           | Romania                | Pharmacy    | Unknown                |
| 16         | 1                          | <i>Hypericum perforatum</i> L.                                                                     | Tablets      | Romania           | Romania                | Pharmacy    | Food supplement        |
| 17         | 5                          | <i>Foeniculum vulgare</i> Mill.                                                                    | Herbal teas  | Romania           | Romania                | Pharmacy    | Food supplement        |
| 17         | 5                          | <i>Hypericum perforatum</i> L.                                                                     | Herbal teas  | Romania           | Romania                | Pharmacy    | Food supplement        |
| 17         | 5                          | <i>Medicago sativa</i> L.                                                                          | Herbal teas  | Romania           | Romania                | Pharmacy    | Food supplement        |
| 17         | 5                          | <i>Origanum vulgare</i> L.                                                                         | Herbal teas  | Romania           | Romania                | Pharmacy    | Food supplement        |
| 17         | 5                          | <i>Salvia sclarea</i> L.                                                                           | Herbal teas  | Romania           | Romania                | Pharmacy    | Food supplement        |
| 18         | 1                          | <i>Hypericum perforatum</i> L.                                                                     | Tablets      | USA               | Romania                | Pharmacy    | Food supplement        |
| 19         | 1                          | <i>Hypericum perforatum</i> L.                                                                     | Herbal teas  | Romania           | Romania                | Pharmacy    | Food supplement        |
| 20         | 1                          | <i>Hypericum perforatum</i> L.                                                                     | Herbal teas  | Poland            | Romania                | E-commerce  | Food supplement        |
| 21         | 1                          | <i>Hypericum perforatum</i> L.                                                                     | Herbal teas  | Romania           | Romania                | Pharmacy    | Food supplement        |
| 22         | 1                          | <i>Hypericum perforatum</i> L.                                                                     | Herbal teas  | Romania           | Romania                | E-commerce  | Food supplement        |
| 23         | 1                          | <i>Hypericum perforatum</i> L.                                                                     | Herbal teas  | Poland            | Romania                | Supermarket | Unknown                |
| 24         | 1                          | <i>Hypericum perforatum</i> L.                                                                     | Herbal teas  | Romania           | Romania                | Pharmacy    | Unknown                |
| 25         | 1                          | <i>Hypericum perforatum</i> L.                                                                     | Herbal teas  | Romania           | Romania                | Supermarket | Unknown                |
| 26         | 1                          | <i>Hypericum perforatum</i> L.                                                                     | Herbal teas  | Romania           | Romania                | Pharmacy    | Unknown                |
| 27         | 1                          | <i>Hypericum perforatum</i> L.                                                                     | Herbal teas  | Romania           | Romania                | Pharmacy    | Food supplement        |
| 28         | 1                          | <i>Hypericum perforatum</i> L.                                                                     | Herbal teas  | Romania           | Romania                | Pharmacy    | Food supplement        |
| 29         | 1                          | <i>Hypericum perforatum</i> L.                                                                     | Herbal teas  | Romania           | Romania                | E-commerce  | Food supplement        |
| 30         | 1                          | <i>Hypericum perforatum</i> L.                                                                     | Herbal teas  | Unknown           | Romania                | E-commerce  | Food supplement        |
| 31         | 14                         | <i>Achillea millefolium</i> L.                                                                     | Herbal teas  | Romania           | Romania                | Health shop | Food supplement        |
| 31         | 14                         | <i>Alchemilla xanthochlora</i> Rothm. (syn. <i>Alchemilla vulgaris</i> L.)                         | Herbal teas  | Romania           | Romania                | Health shop | Food supplement        |
| 31         | 14                         | <i>Calendula officinalis</i> L.                                                                    | Herbal teas  | Romania           | Romania                | Health shop | Food supplement        |
| 31         | 14                         | <i>Capsella bursa-pastoris</i> (L.) Medik.                                                         | Herbal teas  | Romania           | Romania                | Health shop | Food supplement        |
| 31         | 14                         | <i>Cichorium intybus</i> L.                                                                        | Herbal teas  | Romania           | Romania                | Health shop | Food supplement        |
| 31         | 14                         | <i>Equisetum arvense</i> L.                                                                        | Herbal teas  | Romania           | Romania                | Health shop | Food supplement        |
| 31         | 14                         | <i>Galium verum</i> L.                                                                             | Herbal teas  | Romania           | Romania                | Health shop | Food supplement        |
| 31         | 14                         | <i>Geranium robertianum</i> L.                                                                     | Herbal teas  | Romania           | Romania                | Health shop | Food supplement        |
| 31         | 14                         | <i>Hypericum perforatum</i> L.                                                                     | Herbal teas  | Romania           | Romania                | Health shop | Food supplement        |
| 31         | 14                         | <i>Lamium album</i> L.                                                                             | Herbal teas  | Romania           | Romania                | Health shop | Food supplement        |
| 31         | 14                         | <i>Leonurus cardiaca</i> L.                                                                        | Herbal teas  | Romania           | Romania                | Health shop | Food supplement        |
| 31         | 14                         | <i>Matricaria chamomilla</i> L.                                                                    | Herbal teas  | Romania           | Romania                | Health shop | Food supplement        |
| 31         | 14                         | <i>Salvia officinalis</i> L.                                                                       | Herbal teas  | Romania           | Romania                | Health shop | Food supplement        |
| 31         | 14                         | <i>Thymus serpyllum</i> L.                                                                         | Herbal teas  | Romania           | Romania                | Health shop | Food supplement        |
| 32         | 7                          | <i>Acorus calamus</i> var. <i>americanus</i> Raf.                                                  | Herbal teas  | Romania           | Romania                | E-commerce  | Food supplement        |

|    |    |                                                                               |             |         |                |             |                 |
|----|----|-------------------------------------------------------------------------------|-------------|---------|----------------|-------------|-----------------|
| 32 | 7  | <i>Allium ursinum</i> L.                                                      | Herbal teas | Romania | Romania        | E-commerce  | Food supplement |
| 32 | 7  | <i>Elaeagnus rhamnoides</i> (L.) A.Nelson ( <i>Hippophae rhamnoides</i> L.)   | Herbal teas | Romania | Romania        | E-commerce  | Food supplement |
| 32 | 7  | <i>Hypericum perforatum</i> L.                                                | Herbal teas | Romania | Romania        | E-commerce  | Food supplement |
| 32 | 7  | <i>Lycopodium clavatum</i> L.                                                 | Herbal teas | Romania | Romania        | E-commerce  | Food supplement |
| 32 | 7  | <i>Mentha pulegium</i> L.                                                     | Herbal teas | Romania | Romania        | E-commerce  | Food supplement |
| 33 | 7  | <i>Salvia officinalis</i> L.                                                  | Herbal teas | Romania | Romania        | E-commerce  | Food supplement |
| 33 | 7  | <i>Arctium lappa</i> L.                                                       | Herbal teas | Romania | Romania        | E-commerce  | Food supplement |
| 33 | 7  | <i>Elaeagnus rhamnoides</i> (L.) A.Nelson ( <i>Hippophae rhamnoides</i> L.)   | Herbal teas | Romania | Romania        | E-commerce  | Food supplement |
| 33 | 7  | <i>Hypericum perforatum</i> L.                                                | Herbal teas | Romania | Romania        | E-commerce  | Food supplement |
| 33 | 7  | <i>Lycopodium clavatum</i> L.                                                 | Herbal teas | Romania | Romania        | E-commerce  | Food supplement |
| 33 | 7  | <i>Salix alba</i> L.                                                          | Herbal teas | Romania | Romania        | E-commerce  | Food supplement |
| 33 | 7  | <i>Taraxacum officinale</i> Webb                                              | Herbal teas | Romania | Romania        | E-commerce  | Food supplement |
| 33 |    | <i>Thymus serpyllum</i> L.                                                    | Herbal teas | Romania | Romania        | E-commerce  | Food supplement |
| 34 | 9  | <i>Achillea millefolium</i> L.                                                | Herbal teas | Romania | Romania        | Pharmacy    | Food supplement |
| 34 | 9  | <i>Calendula officinalis</i> L.                                               | Herbal teas | Romania | Romania        | Pharmacy    | Food supplement |
| 34 | 9  | <i>Foeniculum vulgare</i> Mill.                                               | Herbal teas | Romania | Romania        | Pharmacy    | Food supplement |
| 34 | 9  | <i>Hypericum perforatum</i> L.                                                | Herbal teas | Romania | Romania        | Pharmacy    | Food supplement |
| 34 | 9  | <i>Mentha × piperita</i> L.                                                   | Herbal teas | Romania | Romania        | Pharmacy    | Food supplement |
| 34 | 9  | <i>Origanum vulgare</i> L.                                                    | Herbal teas | Romania | Romania        | Pharmacy    | Food supplement |
| 34 | 9  | <i>Robinia pseudoacacia</i> L.                                                | Herbal teas | Romania | Romania        | Pharmacy    | Food supplement |
| 34 | 9  | <i>Taraxacum officinale</i> Webb                                              | Herbal teas | Romania | Romania        | Pharmacy    | Food supplement |
| 34 | 9  | <i>Urtica dioica</i> L.                                                       | Herbal teas | Romania | Romania        | Pharmacy    | Food supplement |
| 35 | 8  | <i>Calendula officinalis</i> L.                                               | Herbal teas | Romania | Romania        | Health shop | Food supplement |
| 35 | 8  | <i>Chelidonium majus</i> L.                                                   | Herbal teas | Romania | Romania        | Health shop | Food supplement |
| 35 | 8  | <i>Cichorium intybus</i> L.                                                   | Herbal teas | Romania | Romania        | Health shop | Food supplement |
| 35 | 8  | <i>Hypericum perforatum</i> L.                                                | Herbal teas | Romania | Romania        | Health shop | Food supplement |
| 35 |    | <i>Mellilotus officinalis</i> subsp. <i>alba</i> (Medik.) H.Obashi & Tateishi | Herbal teas | Romania | Romania        | Health shop | Food supplement |
| 35 | 8  | <i>Mentha × piperita</i> L.                                                   | Herbal teas | Romania | Romania        | Health shop | Food supplement |
| 35 | 8  | <i>Peumus boldus</i> Molina                                                   | Herbal teas | Romania | Romania        | Health shop | Food supplement |
| 35 | 8  | <i>Silybum marianum</i> (L.) Gaertn. (syn. <i>Carduus marianus</i> L.)        | Herbal teas | Romania | Romania        | Health shop | Food supplement |
| 36 | 10 | <i>Achillea millefolium</i> L.                                                | Herbal teas | Romania | Romania        | Pharmacy    | Food supplement |
| 36 | 10 | <i>Agrimonia eupatoria</i> L.                                                 | Herbal teas | Romania | Romania        | Pharmacy    | Food supplement |
| 36 | 10 | <i>Chelidonium majus</i> L.                                                   | Herbal teas | Romania | Romania        | Pharmacy    | Food supplement |
| 36 | 10 | <i>Convolvulus arvensis</i> L.                                                | Herbal teas | Romania | Romania        | Pharmacy    | Food supplement |
| 36 | 10 | <i>Frangula dodonei</i> Ard. ( <i>Rhamnus frangula</i> L.)                    | Herbal teas | Romania | Romania        | Pharmacy    | Food supplement |
| 36 | 10 | <i>Hypericum perforatum</i> L.                                                | Herbal teas | Romania | Romania        | Pharmacy    | Food supplement |
| 36 | 10 | <i>Mentha × piperita</i> L.                                                   | Herbal teas | Romania | Romania        | Pharmacy    | Food supplement |
| 36 | 10 | <i>Rosa canina</i> L.                                                         | Herbal teas | Romania | Romania        | Pharmacy    | Food supplement |
| 36 | 10 | <i>Taraxacum officinale</i> Webb                                              | Herbal teas | Romania | Romania        | Pharmacy    | Food supplement |
| 36 | 10 | <i>Zea mays</i> L.                                                            | Herbal teas | Romania | Romania        | Pharmacy    | Food supplement |
| 37 | 4  | <i>Achillea millefolium</i> L.                                                | Herbal teas | Romania | Romania        | Pharmacy    | Food supplement |
| 37 | 4  | <i>Convolvulus arvensis</i> L.                                                | Herbal teas | Romania | Romania        | Pharmacy    | Food supplement |
| 37 | 4  | <i>Hypericum perforatum</i> L.                                                | Herbal teas | Romania | Romania        | Pharmacy    | Food supplement |
| 37 | 4  | <i>Taraxacum officinale</i> Webb                                              | Herbal teas | Romania | Romania        | Pharmacy    | Food supplement |
| 38 | 4  | <i>Achillea millefolium</i> L.                                                | Herbal teas | Romania | Romania        | Pharmacy    | Food supplement |
| 38 | 4  | <i>Althaea officinalis</i> L.                                                 | Herbal teas | Romania | Romania        | Pharmacy    | Food supplement |
| 38 | 4  | <i>Convolvulus arvensis</i> L.                                                | Herbal teas | Romania | Romania        | Pharmacy    | Food supplement |
| 38 | 4  | <i>Hypericum perforatum</i> L.                                                | Herbal teas | Romania | Romania        | Pharmacy    | Food supplement |
| 39 | 5  | <i>Calendula officinalis</i> L.                                               | Tablets     | Romania | Romania        | Pharmacy    | Food supplement |
| 39 | 5  | <i>Foeniculum vulgare</i> Mill.                                               | Tablets     | Romania | Romania        | Pharmacy    | Food supplement |
| 39 | 5  | <i>Hypericum perforatum</i> L.                                                | Tablets     | Romania | Romania        | Pharmacy    | Food supplement |
| 39 | 5  | <i>Origanum vulgare</i> L.                                                    | Tablets     | Romania | Romania        | Pharmacy    | Food supplement |
| 39 | 5  | <i>Plantago</i> spp.                                                          | Tablets     | Romania | Romania        | Pharmacy    | Food supplement |
| 40 | 2  | <i>Hypericum perforatum</i> L.                                                | Tablets     | Romania | Romania        | Pharmacy    | Food supplement |
| 40 | 2  | <i>Lavandula latifolia</i> Medik. (syn. <i>Lavandula angustifolia</i> Moench) | Tablets     | Romania | Romania        | Pharmacy    | Food supplement |
| 41 | 1  | <i>Hypericum perforatum</i> L.                                                | Capsules    | Romania | Romania        | Pharmacy    | Food supplement |
| 42 | 7  | <i>Aloe vera</i> (L.) Burm.f. (syn. <i>Aloe barbadensis</i> Mill.)            | Capsules    | Romania | Romania        | Pharmacy    | Food supplement |
| 42 | 7  | <i>Calendula officinalis</i> L.                                               | Capsules    | Romania | Romania        | Pharmacy    | Food supplement |
| 42 | 7  | <i>Citrus paradisi</i> Macfad.                                                | Capsules    | Romania | Romania        | Pharmacy    | Food supplement |
| 42 | 7  | <i>Hypericum perforatum</i> L.                                                | Capsules    | Romania | Romania        | Pharmacy    | Food supplement |
| 42 | 7  | <i>Lithothamnion calcareum</i> (Pallas)                                       | Capsules    | Romania | Romania        | Pharmacy    | Food supplement |
| 42 | 7  | <i>Melissa officinalis</i> L.                                                 | Capsules    | Romania | Romania        | Pharmacy    | Food supplement |
| 42 | 7  | <i>Passiflora edulis</i> Sims (syn. <i>Passiflora incarnata</i> L.)           | Capsules    | Romania | Romania        | Pharmacy    | Food supplement |
| 43 | 5  | <i>Hypericum perforatum</i> L.                                                | Capsules    | Romania | Romania        | Pharmacy    | Food supplement |
| 43 | 5  | <i>Melissa officinalis</i> L.                                                 | Capsules    | Romania | Romania        | Pharmacy    | Food supplement |
| 43 | 5  | <i>Passiflora edulis</i> Sims (syn. <i>Passiflora incarnata</i> L.)           | Capsules    | Romania | Romania        | Pharmacy    | Food supplement |
| 43 | 5  | <i>Trigonella foenum-graecum</i> L.                                           | Capsules    | Romania | Romania        | Pharmacy    | Food supplement |
| 43 | 5  | <i>Valeriana officinalis</i> L.                                               | Capsules    | Romania | Romania        | Pharmacy    | Food supplement |
| 44 | 1  | <i>Hypericum perforatum</i> L.                                                | Herbal teas | Unknown | Spain          | Health shop | Unknown         |
| 45 | 1  | <i>Hypericum perforatum</i> L.                                                | Herbal teas | Germany | Germany        | Health shop | Herbal medicine |
| 46 | 1  | <i>Hypericum perforatum</i> L.                                                | Herbal teas | Germany | Germany        | Health shop | Herbal medicine |
| 47 | 1  | <i>Hypericum perforatum</i> L.                                                | Capsules    | Germany | Germany        | Health shop | Herbal medicine |
| 48 | 1  | <i>Hypericum perforatum</i> L.                                                | Tablets     | Germany | Germany        | Health shop | Herbal medicine |
| 49 | 1  | <i>Hypericum perforatum</i> L.                                                | Tablets     | France  | France         | Pharmacy    | Herbal medicine |
| 50 | 1  | <i>Hypericum perforatum</i> L.                                                | Herbal teas | Poland  | Poland         | E-commerce  | Food supplement |
| 51 | 2  | <i>Hypericum perforatum</i> L.                                                | Capsules    | Poland  | Poland         | Health shop | Food supplement |
| 51 | 2  | <i>Panax ginseng</i>                                                          | Capsules    | Poland  | Poland         | Health shop | Food supplement |
| 52 | 11 | <i>Avena sativa</i> L.                                                        | Herbal teas | Poland  | Poland         | Health shop | Herbal medicine |
| 52 | 11 | <i>Cirsium oleraceum</i> (L.) Scop.                                           | Herbal teas | Poland  | Poland         | Health shop | Herbal medicine |
| 52 | 11 | <i>Citrus limon</i> (L.) Osbeck                                               | Herbal teas | Poland  | Poland         | Health shop | Herbal medicine |
| 52 | 11 | <i>Elsholtzia</i> spp.                                                        | Herbal teas | Poland  | Poland         | Health shop | Herbal medicine |
| 52 | 11 | <i>Galium verum</i> L.                                                        | Herbal teas | Poland  | Poland         | Health shop | Herbal medicine |
| 52 | 11 | <i>Heracleum mantegazzianum</i> Sommier & Levier                              | Herbal teas | Poland  | Poland         | Health shop | Herbal medicine |
| 52 | 11 | <i>Humulus lupulus</i> L.                                                     | Herbal teas | Poland  | Poland         | Health shop | Herbal medicine |
| 52 | 11 | <i>Hypericum perforatum</i> L.                                                | Herbal teas | Poland  | Poland         | Health shop | Herbal medicine |
| 52 | 11 | <i>Stachys officinalis</i> (L.) Trevis.                                       | Herbal teas | Poland  | Poland         | Health shop | Herbal medicine |
| 52 | 11 | <i>Verbena officinalis</i> L.                                                 | Herbal teas | Poland  | Poland         | Health shop | Herbal medicine |
| 52 | 11 | <i>Veronica officinalis</i> L.                                                | Herbal teas | Poland  | Poland         | Health shop | Herbal medicine |
| 53 | 1  | <i>Hypericum perforatum</i> L.                                                | Tablets     | Poland  | Poland         | Health shop | Herbal medicine |
| 54 | 2  | <i>Hypericum perforatum</i> L.                                                | Capsules    | Italy   | Italy          | Health shop | Food supplement |
| 54 | 2  | <i>Tilia</i> spp.                                                             | Capsules    | Italy   | Italy          | Health shop | Food supplement |
| 55 | 1  | <i>Hypericum perforatum</i> L.                                                | Herbal teas | USA     | Czech Republic | Health shop | Food supplement |
| 56 | 1  | <i>Hypericum perforatum</i> L.                                                | Herbal teas | Austria | Austria        | Pharmacy    | Unknown         |
| 57 | 9  | <i>Achillea millefolium</i> L.                                                | Herbal teas | Austria | Austria        | Pharmacy    | Unknown         |
| 57 | 9  | <i>Elymus repens</i> (L.) Gould                                               | Herbal teas | Austria | Austria        | Pharmacy    | Unknown         |
| 57 | 9  | <i>Glycyrrhiza glabra</i> L.                                                  | Herbal teas | Austria | Austria        | Pharmacy    | Unknown         |
| 57 | 9  | <i>Hypericum perforatum</i> L.                                                | Herbal teas | Austria | Austria        | Pharmacy    | Unknown         |
| 57 | 9  | <i>Juniperus communis</i> L.                                                  | Herbal teas | Austria | Austria        | Pharmacy    | Unknown         |
| 57 | 9  | <i>Mentha × piperita</i> L.                                                   | Herbal teas | Austria | Austria        | Pharmacy    | Unknown         |

|    |    |                                                                                                    |             |                |                |             |                 |
|----|----|----------------------------------------------------------------------------------------------------|-------------|----------------|----------------|-------------|-----------------|
| 57 | 9  | <i>Pimpinella anisum</i> L.                                                                        | Herbal teas | Austria        | Austria        | Pharmacy    | Unknown         |
| 57 | 9  | <i>Taraxacum officinale</i> Webb                                                                   | Herbal teas | Austria        | Austria        | Pharmacy    | Unknown         |
| 57 | 9  | <i>Viola tricolor</i> L.                                                                           | Herbal teas | Austria        | Austria        | Pharmacy    | Unknown         |
| 58 | 1  | <i>Hypericum perforatum</i> L.                                                                     | Herbal teas | Sweeden        | Sweeden        | Health shop | Herbal medicine |
| 59 | 1  | <i>Hypericum perforatum</i> L.                                                                     | Extracts    | Germany        | Germany        | Health shop | Unknown         |
| 60 | 1  | <i>Hypericum perforatum</i> L.                                                                     | Tablets     | USA            | Nederland      | Health shop | Food supplement |
| 61 | 1  | <i>Hypericum perforatum</i> L.                                                                     | Tablets     | Unknown        | UK             | Health shop | Herbal medicine |
| 62 | 5  | <i>Citrus limon</i> (L.) Osbeck                                                                    | Herbal teas | Slovakia       | United Kingdom | Health shop | Food supplement |
| 62 | 5  | <i>Citrus sinensis</i> (L.) Osbeck                                                                 | Herbal teas | Slovakia       | Slovakia       | Health shop | Food supplement |
| 62 | 5  | <i>Hypericum perforatum</i> L.                                                                     | Herbal teas | Slovakia       | Slovakia       | Health shop | Food supplement |
| 62 | 5  | <i>Lavandula</i> spp.                                                                              | Herbal teas | Slovakia       | Slovakia       | Health shop | Food supplement |
| 62 | 5  | <i>Passiflora edulis</i> Sims (syn. <i>Passiflora incarnata</i> L.)                                | Herbal teas | Slovakia       | Slovakia       | Health shop | Food supplement |
| 63 | 4  | <i>Humulus lupulus</i> L.                                                                          | Herbal teas | Czech Republic | Slovakia       | Health shop | Food supplement |
| 63 | 4  | <i>Hypericum perforatum</i> L.                                                                     | Herbal teas | Czech Republic | Slovakia       | Health shop | Food supplement |
| 63 | 4  | <i>Matricaria chamomilla</i> L.                                                                    | Herbal teas | Czech Republic | Slovakia       | Health shop | Food supplement |
| 63 | 4  | <i>Mentha</i> spp.                                                                                 | Herbal teas | Czech Republic | Slovakia       | Health shop | Food supplement |
| 63 | 4  | <i>Valeriana officinalis</i> L.                                                                    | Herbal teas | Czech Republic | Slovakia       | Health shop | Food supplement |
| 64 | 10 | <i>Achillea millefolium</i> L.                                                                     | Herbal teas | Slovakia       | Slovakia       | Health shop | Food supplement |
| 64 | 10 | <i>Acorus calamus</i> var. <i>americanus</i> Raf.                                                  | Herbal teas | Slovakia       | Slovakia       | Health shop | Food supplement |
| 64 | 10 | <i>Calendula officinalis</i> L.                                                                    | Herbal teas | Slovakia       | Slovakia       | Health shop | Food supplement |
| 64 | 10 | <i>Centaurium erythraea</i> Rafn                                                                   | Herbal teas | Slovakia       | Slovakia       | Health shop | Food supplement |
| 64 | 10 | <i>Cichorium intybus</i> L.                                                                        | Herbal teas | Slovakia       | Slovakia       | Health shop | Food supplement |
| 64 | 10 | <i>Galiun verum</i> L.                                                                             | Herbal teas | Slovakia       | Slovakia       | Health shop | Food supplement |
| 64 | 10 | <i>Helichrysum arenarium</i> (L.) DC.                                                              | Herbal teas | Slovakia       | Slovakia       | Health shop | Food supplement |
| 64 | 10 | <i>Hypericum perforatum</i> L.                                                                     | Herbal teas | Slovakia       | Slovakia       | Health shop | Food supplement |
| 64 | 10 | <i>Taraxacum officinale</i> Webb                                                                   | Herbal teas | Slovakia       | Slovakia       | Health shop | Food supplement |
| 64 | 10 | <i>Urtica dioica</i> L.                                                                            | Herbal teas | Slovakia       | Slovakia       | Health shop | Food supplement |
| 65 | 1  | <i>Hypericum perforatum</i> L.                                                                     | Tablets     | United Kingdom | United Kingdom | Health shop | Herbal medicine |
| 66 | 1  | <i>Hypericum perforatum</i> L.                                                                     | Capsules    | Spain          | Spain          | Pharmacy    | Herbal medicine |
| 67 | 1  | <i>Hypericum perforatum</i> L.                                                                     | Tablets     | USA            | Turkey         | Pharmacy    | Food supplement |
| 68 | 2  | <i>Hypericum perforatum</i> L.                                                                     | Extracts    | Turkey         | Turkey         | Pharmacy    | Unknown         |
| 68 | 2  | <i>Olea europaea</i> L.                                                                            | Extracts    | Turkey         | Turkey         | Pharmacy    | Unknown         |
| 69 | 1  | <i>Hypericum perforatum</i> L.                                                                     | Extracts    | Turkey         | Turkey         | Pharmacy    | Unknown         |
| 70 | 13 | <i>Achillea millefolium</i> L.                                                                     | Herbal teas | Turkey         | Turkey         | Pharmacy    | Unknown         |
| 70 | 13 | <i>Calluna vulgaris</i> (L.) Hull                                                                  | Herbal teas | Turkey         | Turkey         | Pharmacy    | Unknown         |
| 70 | 13 | <i>Camellia sinensis</i> (L.) Kuntze                                                               | Herbal teas | Turkey         | Turkey         | Pharmacy    | Unknown         |
| 70 | 13 | <i>Foeniculum vulgare</i> Mill.                                                                    | Herbal teas | Turkey         | Turkey         | Pharmacy    | Unknown         |
| 70 | 13 | <i>Frangula dodonei</i> Ard. ( <i>Rhamnus frangula</i> L.)                                         | Herbal teas | Turkey         | Turkey         | Pharmacy    | Unknown         |
| 70 | 13 | <i>Hibiscus</i> spp.                                                                               | Herbal teas | Turkey         | Turkey         | Pharmacy    | Unknown         |
| 70 | 13 | <i>Hypericum perforatum</i> L.                                                                     | Herbal teas | Turkey         | Turkey         | Pharmacy    | Unknown         |
| 70 | 13 | <i>Paullinia cupana</i> Kunth                                                                      | Herbal teas | Turkey         | Turkey         | Pharmacy    | Unknown         |
| 70 | 13 | <i>Pimpinella anisum</i> L.                                                                        | Herbal teas | Turkey         | Turkey         | Pharmacy    | Unknown         |
| 70 | 13 | <i>Prunus avium</i> (L.) L.                                                                        | Herbal teas | Turkey         | Turkey         | Pharmacy    | Unknown         |
| 70 | 13 | <i>Rosmarinus officinalis</i> L.                                                                   | Herbal teas | Turkey         | Turkey         | Pharmacy    | Unknown         |
| 70 | 13 | <i>Satureja hortensis</i> L.                                                                       | Herbal teas | Turkey         | Turkey         | Pharmacy    | Unknown         |
| 70 | 13 | <i>Stevia rebaudiana</i> (Bertoni) Bertoni                                                         | Herbal teas | Turkey         | Turkey         | Pharmacy    | Unknown         |
| 71 | 8  | <i>Achillea millefolium</i> L.                                                                     | Herbal teas | Romania        | Romania        | Pharmacy    | Food supplement |
| 71 | 8  | <i>Calendula officinalis</i> L.                                                                    | Herbal teas | Romania        | Romania        | Pharmacy    | Food supplement |
| 71 | 8  | <i>Gentiana asclepiadea</i> L.                                                                     | Herbal teas | Romania        | Romania        | Pharmacy    | Food supplement |
| 71 | 8  | <i>Hypericum perforatum</i> L.                                                                     | Herbal teas | Romania        | Romania        | Pharmacy    | Food supplement |
| 71 | 8  | <i>Melissa officinalis</i> L.                                                                      | Herbal teas | Romania        | Romania        | Pharmacy    | Food supplement |
| 71 | 8  | <i>Silybum marianum</i> (L.) Gaertn. (syn. <i>Carduus marianus</i> L.)                             | Herbal teas | Romania        | Romania        | Pharmacy    | Food supplement |
| 71 | 8  | <i>Stevia rebaudiana</i> (Bertoni) Bertoni                                                         | Herbal teas | Romania        | Romania        | Pharmacy    | Food supplement |
| 71 | 8  | <i>Veronica officinalis</i> L.                                                                     | Herbal teas | Romania        | Romania        | Pharmacy    | Food supplement |
| 72 | 6  | <i>Cichorium intybus</i> L.                                                                        | Capsules    | Romania        | Romania        | Pharmacy    | Food supplement |
| 72 | 6  | <i>Cynara scolymus</i> L.                                                                          | Capsules    | Romania        | Romania        | Pharmacy    | Food supplement |
| 72 | 6  | <i>Gentiana lutea</i> L.                                                                           | Capsules    | Romania        | Romania        | Pharmacy    | Food supplement |
| 72 | 6  | <i>Hypericum perforatum</i> L.                                                                     | Capsules    | Romania        | Romania        | Pharmacy    | Food supplement |
| 72 | 6  | <i>Silybum marianum</i> (L.) Gaertn.                                                               | Capsules    | Romania        | Romania        | Pharmacy    | Food supplement |
| 72 | 6  | <i>Taraxacum officinale</i> Webb                                                                   | Capsules    | Romania        | Romania        | Pharmacy    | Food supplement |
| 73 | 11 | <i>Achillea millefolium</i> L.                                                                     | Extracts    | Romania        | Romania        | Pharmacy    | Food supplement |
| 73 | 11 | <i>Calendula officinalis</i> L.                                                                    | Extracts    | Romania        | Romania        | Pharmacy    | Food supplement |
| 73 | 11 | <i>Carthamus tinctorius</i> L.                                                                     | Extracts    | Romania        | Romania        | Pharmacy    | Food supplement |
| 73 | 11 | <i>Chelidonium majus</i> L.                                                                        | Extracts    | Romania        | Romania        | Pharmacy    | Food supplement |
| 73 | 11 | <i>Cynara scolymus</i> L.                                                                          | Extracts    | Romania        | Romania        | Pharmacy    | Food supplement |
| 73 | 11 | <i>Gentiana lutea</i> L.                                                                           | Extracts    | Romania        | Romania        | Pharmacy    | Food supplement |
| 73 | 11 | <i>Hypericum perforatum</i> L.                                                                     | Extracts    | Romania        | Romania        | Pharmacy    | Food supplement |
| 73 | 11 | <i>Lavandula angustifolia</i> subsp. <i>angustifolia</i> (syn. <i>Lavandula officinalis</i> Chaix) | Extracts    | Romania        | Romania        | Pharmacy    | Food supplement |
| 73 | 11 | <i>Melissa officinalis</i> L.                                                                      | Extracts    | Romania        | Romania        | Pharmacy    | Food supplement |
| 73 | 11 | <i>Silybum marianum</i> (L.) Gaertn.                                                               | Extracts    | Romania        | Romania        | Pharmacy    | Food supplement |
| 73 | 11 | <i>Viscum album</i> L.                                                                             | Extracts    | Romania        | Romania        | Pharmacy    | Food supplement |
| 74 | 10 | <i>Agrimonia eupatoria</i> L.                                                                      | Herbal teas | Romania        | Romania        | Health shop | Food supplement |
| 74 | 10 | <i>Calendula officinalis</i> L.                                                                    | Herbal teas | Romania        | Romania        | Health shop | Food supplement |
| 74 | 10 | <i>Centaurium erythraea</i> Rafn                                                                   | Herbal teas | Romania        | Romania        | Health shop | Food supplement |
| 74 | 10 | <i>Chelidonium majus</i> L.                                                                        | Herbal teas | Romania        | Romania        | Health shop | Food supplement |
| 74 | 10 | <i>Cichorium intybus</i> L.                                                                        | Herbal teas | Romania        | Romania        | Health shop | Food supplement |
| 74 | 10 | <i>Cynara scolymus</i> L.                                                                          | Herbal teas | Romania        | Romania        | Health shop | Food supplement |
| 74 | 10 | <i>Equisetum arvense</i> L.                                                                        | Herbal teas | Romania        | Romania        | Health shop | Food supplement |
| 74 | 10 | <i>Gentiana lutea</i> L.                                                                           | Herbal teas | Romania        | Romania        | Health shop | Food supplement |
| 74 | 10 | <i>Hypericum perforatum</i> L.                                                                     | Herbal teas | Romania        | Romania        | Health shop | Food supplement |
| 74 | 10 | <i>Lycopodium clavatum</i> L.                                                                      | Herbal teas | Romania        | Romania        | Health shop | Food supplement |
| 75 | 18 | <i>Achillea millefolium</i> L.                                                                     | Herbal teas | Romania        | Romania        | Health shop | Food supplement |
| 75 | 18 | <i>Agrimonia eupatoria</i> L.                                                                      | Herbal teas | Romania        | Romania        | Health shop | Food supplement |
| 75 | 18 | <i>Artemisia absinthium</i> L.                                                                     | Herbal teas | Romania        | Romania        | Health shop | Food supplement |
| 75 | 18 | <i>Calendula officinalis</i> L.                                                                    | Herbal teas | Romania        | Romania        | Health shop | Food supplement |
| 75 | 18 | <i>Calendula officinalis</i> L.                                                                    | Herbal teas | Romania        | Romania        | Health shop | Food supplement |
| 75 | 18 | <i>Centaurium erythraea</i> Rafn                                                                   | Herbal teas | Romania        | Romania        | Health shop | Food supplement |
| 75 | 18 | <i>Cotinus coggygria</i> Scop.                                                                     | Herbal teas | Romania        | Romania        | Health shop | Food supplement |
| 75 | 18 | <i>Echinacea</i> spp.                                                                              | Herbal teas | Romania        | Romania        | Health shop | Food supplement |
| 75 | 18 | <i>Equisetum arvense</i> L.                                                                        | Herbal teas | Romania        | Romania        | Health shop | Food supplement |
| 75 | 18 | <i>Gentiana lutea</i> L.                                                                           | Herbal teas | Romania        | Romania        | Health shop | Food supplement |
| 75 | 18 | <i>Geranium robertianum</i> L.                                                                     | Herbal teas | Romania        | Romania        | Health shop | Food supplement |
| 75 | 18 | <i>Hypericum perforatum</i> L.                                                                     | Herbal teas | Romania        | Romania        | Health shop | Food supplement |
| 75 | 18 | <i>Linaria vulgaris</i> Mill.                                                                      | Herbal teas | Romania        | Romania        | Health shop | Food supplement |
| 75 | 18 | <i>Lythrum salicaria</i> L.                                                                        | Herbal teas | Romania        | Romania        | Health shop | Food supplement |
| 75 | 18 | <i>Robinia pseudoacacia</i> L.                                                                     | Herbal teas | Romania        | Romania        | Health shop | Food supplement |
| 75 | 18 | <i>Salvia officinalis</i> L.                                                                       | Herbal teas | Romania        | Romania        | Health shop | Food supplement |
| 75 | 18 | <i>Symphytum officinale</i> L.                                                                     | Herbal teas | Romania        | Romania        | Health shop | Food supplement |

|    |    |                                                                                  |             |         |         |             |                 |
|----|----|----------------------------------------------------------------------------------|-------------|---------|---------|-------------|-----------------|
| 75 | 18 | <i>Zea mays</i> L.                                                               | Herbal teas | Romania | Romania | Health shop | Food supplement |
| 76 | 18 | <i>Achillea millefolium</i> L.                                                   | Herbal teas | Romania | Romania | Health shop | Food supplement |
| 76 | 18 | <i>Agrimonia eupatoria</i> L.                                                    | Herbal teas | Romania | Romania | Health shop | Food supplement |
| 76 | 18 | <i>Antirrhinum majus</i> L.                                                      | Herbal teas | Romania | Romania | Health shop | Food supplement |
| 76 | 18 | <i>Aruncus dioicus</i> (Walter) Fernald                                          | Herbal teas | Romania | Romania | Health shop | Food supplement |
| 76 | 18 | <i>Calendula officinalis</i> L.                                                  | Herbal teas | Romania | Romania | Health shop | Food supplement |
| 76 | 18 | <i>Centaurium erythraea</i> Rafn                                                 | Herbal teas | Romania | Romania | Health shop | Food supplement |
| 76 | 18 | <i>Chelidonium majus</i> L.                                                      | Herbal teas | Romania | Romania | Health shop | Food supplement |
| 76 | 18 | <i>Cichorium intybus</i> L.                                                      | Herbal teas | Romania | Romania | Health shop | Food supplement |
| 76 | 18 | <i>Cynara scolymus</i> L.                                                        | Herbal teas | Romania | Romania | Health shop | Food supplement |
| 76 | 18 | <i>Echinacea</i> spp.                                                            | Herbal teas | Romania | Romania | Health shop | Food supplement |
| 76 | 18 | <i>Equisetum arvense</i> L.                                                      | Herbal teas | Romania | Romania | Health shop | Food supplement |
| 76 | 18 | <i>Gentiana lutea</i> L.                                                         | Herbal teas | Romania | Romania | Health shop | Food supplement |
| 76 | 18 | <i>Hypericum perforatum</i> L.                                                   | Herbal teas | Romania | Romania | Health shop | Food supplement |
| 76 | 18 | <i>Linaria vulgaris</i> Mill.                                                    | Herbal teas | Romania | Romania | Health shop | Food supplement |
| 76 | 18 | <i>Lycopodium clavatum</i> L.                                                    | Herbal teas | Romania | Romania | Health shop | Food supplement |
| 76 | 18 | <i>Potentilla anserina</i> L. (syn. <i>Argentina anserina</i> (L.) Rydb.)        | Herbal teas | Romania | Romania | Health shop | Food supplement |
| 76 | 18 | <i>Salvia officinalis</i> L.                                                     | Herbal teas | Romania | Romania | Health shop | Food supplement |
| 76 | 18 | <i>Verbascum phlomoides</i> L.                                                   | Herbal teas | Romania | Romania | Health shop | Food supplement |
| 77 | 23 | <i>Achillea millefolium</i> L.                                                   | Herbal teas | Romania | Romania | Health shop | Food supplement |
| 77 | 23 | <i>Agrimonia eupatoria</i> L.                                                    | Herbal teas | Romania | Romania | Health shop | Food supplement |
| 77 | 23 | <i>Antirrhinum majus</i> L.                                                      | Herbal teas | Romania | Romania | Health shop | Food supplement |
| 77 | 23 | <i>Asplenium scolopendrium</i> var. <i>americanum</i> (Fernald) Kartesz & Gandhi | Herbal teas | Romania | Romania | Health shop | Food supplement |
| 77 | 23 | <i>Calendula officinalis</i> L.                                                  | Herbal teas | Romania | Romania | Health shop | Food supplement |
| 77 | 23 | <i>Centaurium erythraea</i> Rafn (syn. <i>Centaurium umbellatum</i> Gilib.)      | Herbal teas | Romania | Romania | Health shop | Food supplement |
| 77 | 23 | <i>Chelidonium majus</i> L.                                                      | Herbal teas | Romania | Romania | Health shop | Food supplement |
| 77 | 23 | <i>Cichorium intybus</i> L.                                                      | Herbal teas | Romania | Romania | Health shop | Food supplement |
| 77 | 23 | <i>Cynara scolymus</i> L.                                                        | Herbal teas | Romania | Romania | Health shop | Food supplement |
| 77 | 23 | <i>Echinacea purpurea</i> (L.) Moench                                            | Herbal teas | Romania | Romania | Health shop | Food supplement |
| 77 | 23 | <i>Equisetum arvense</i> L.                                                      | Herbal teas | Romania | Romania | Health shop | Food supplement |
| 77 | 23 | <i>Filipendula ulmaria</i> (L.) Maxim.                                           | Herbal teas | Romania | Romania | Health shop | Food supplement |
| 77 | 23 | <i>Frangula dadonei</i> Ard. ( <i>Rhamnus frangula</i> L.)                       | Herbal teas | Romania | Romania | Health shop | Food supplement |
| 77 | 23 | <i>Gentiana lutea</i> L.                                                         | Herbal teas | Romania | Romania | Health shop | Food supplement |
| 77 | 23 | <i>Gentiana punctata</i> L.                                                      | Herbal teas | Romania | Romania | Health shop | Food supplement |
| 77 | 23 | <i>Hypericum perforatum</i> L.                                                   | Herbal teas | Romania | Romania | Health shop | Food supplement |
| 77 | 23 | <i>Linaria vulgaris</i> Mill.                                                    | Herbal teas | Romania | Romania | Health shop | Food supplement |
| 77 | 23 | <i>Lycopodium clavatum</i> L.                                                    | Herbal teas | Romania | Romania | Health shop | Food supplement |
| 77 | 23 | <i>Lysimachia vulgaris</i> L.                                                    | Herbal teas | Romania | Romania | Health shop | Food supplement |
| 77 | 23 | <i>Potentilla anserina</i> L.                                                    | Herbal teas | Romania | Romania | Health shop | Food supplement |
| 77 | 23 | <i>Salvia officinalis</i> L.                                                     | Herbal teas | Romania | Romania | Health shop | Food supplement |
| 77 | 23 | <i>Verbascum phlomoides</i> L.                                                   | Herbal teas | Romania | Romania | Health shop | Food supplement |
| 78 | 7  | <i>Achillea millefolium</i> L.                                                   | Extracts    | Romania | Romania | Pharmacy    | Food supplement |
| 78 | 7  | <i>Calendula officinalis</i> L.                                                  | Extracts    | Romania | Romania | Pharmacy    | Food supplement |
| 78 | 7  | <i>Gentiana lutea</i> L.                                                         | Extracts    | Romania | Romania | Pharmacy    | Food supplement |
| 78 | 7  | <i>Hypericum perforatum</i> L.                                                   | Extracts    | Romania | Romania | Pharmacy    | Food supplement |
| 78 | 7  | <i>Melissa officinalis</i> L.                                                    | Extracts    | Romania | Romania | Pharmacy    | Food supplement |
| 78 | 7  | <i>Silybum marianum</i> (L.) Gaertn.                                             | Extracts    | Romania | Romania | Pharmacy    | Food supplement |
| 78 | 7  | <i>Veronica officinalis</i> L.                                                   | Extracts    | Romania | Romania | Pharmacy    | Food supplement |
